# Supplementary material for: Fetal and neonatal hematopoietic progenitors are functionally and transcriptionally resistant to Flt3-ITD mutations
Source: eLife. 2016 Nov 23;5:e18882. doi: 10.7554/eLife.18882 (PMC5153248; doi:10.7554/eLife.18882)
Supplement: Figure 7—source data 1. — Fold changes are shown for 270 probes that represent 254 differentially expressed genes in Flt3ITD/+ HPCs relative to controls. HSC fold change data are also shown. P-values and adjusted p-values reflect significance across the entire time course. DOI: http://dx.doi.org/10.7554/eLife.18882.013 [file elife-18882-fig7-data1.xlsx]

## Sheet: Table S1
Figure 7 - source data table 1. 270 probes representing 254 significantly differentially expressed genes in Flt3-ITD mutant progenitors (Fold change ≥2 for at least one time point, adj.p<0.05)
	HSCs (fold change ITD/+ vs +/+)						HPCs (fold change ITD/+ vs +/+)
Gene	p value	adj.p	E14.5	P0	P14	Adult	p value	adj.p	E14.5	P0	P14	Adult
Socs2	0.0328187	0.192765	-1.04393	1.01292	-1.58403	1.50214	3.24586e-18	8.7247e-14	1.81617	3.04502	10.7326	23.709
Socs2	0.0151949	0.164646	1.04585	-1.38656	-1.53861	1.92359	6.74644e-18	1.20894e-13	1.51806	3.16219	7.41502	21.057
Socs2	0.0165149	0.16723	-1.03365	-1.52947	-1.60985	1.91516	1.89516e-18	8.7247e-14	1.75133	3.15218	10.5388	19.5974
Vmn2r91	0.385873	0.548598	-5.75757	1.06439	1.50351	-1.08097	7.52376e-05	0.0126793	-4.90369	1.05153	2.48935	11.916
Sparc	0.0355333	0.196331	-1.04129	-4.22922	1.0377	3.27465	1.85356e-10	9.05866e-07	3.9196	3.3983	17.236	11.3899
Sfrp2	0.104513	0.282326	1.13404	-1.916	-1.69135	-1.13862	3.95615e-09	1.11936e-05	1.14351	6.44472	19.0749	10.9085
Vmn1r55	0.115775	0.295437	-3.21119	2.8984	3.455	-2.44972	1.94462e-06	0.00117462	-11.0544	1.49872	11.4048	10.7332
Itgb6	0.0348834	0.195547	1.95893	-1.86111	3.43901	1.65554	0.000383639	0.0325814	2.22744	-1.12654	4.69904	8.86257
Ceacam15	0.767741	0.83576	-2.0172	1.77174	-1.16115	-1.20198	0.000161406	0.0199931	1.28024	2.11004	1.05934	8.30078
Olfr881	0.1759	0.361169	-2.07423	-2.8255	-3.21602	-1.77112	0.000350986	0.0311717	-2.79332	-1.36223	1.51821	7.77645
Cdkn2a	0.00432725	0.151631	-10.0163	2.39446	2.30579	-5.04636	0.000412499	0.0338415	-6.2681	1.83534	3.0483	7.16072
Rhox4g	0.526499	0.65983	-2.35457	1.38697	1.86797	1.32756	1.31637e-05	0.00442292	-2.93771	1.38974	1.73645	7.02127
Tgfb2	0.412668	0.569976	-1.25973	-1.84483	-1.55601	1.83184	0.000528243	0.0389011	-3.24607	1.50257	3.91505	6.95405
Olfr1019	0.110243	0.289156	-3.84037	-1.04808	-1.34379	-1.74816	0.000557731	0.0400843	-1.91457	1.54015	1.79046	6.85565
Dmkn	0.366436	0.532533	1.03921	2.27873	2.82225	-1.89104	0.00069601	0.0460798	-1.75747	1.43561	6.95	6.84076
4930515G13Rik	0.7508	0.823905	-2.55073	1.96676	-1.06879	-1.29633	0.000229506	0.0247254	-9.87635	3.63029	2.19251	6.74142
Rhox2e	0.296952	0.47275	-2.95493	1.13441	1.39444	-1.22452	0.000461305	0.035889	-2.83467	1.5854	1.4165	6.38191
2610027H17Rik	0.316553	0.489729	-5.39036	-1.11898	1.53115	-1.89128	6.47118e-05	0.0115576	-6.22456	1.41991	4.04218	6.13389
Id1	7.5993e-05	0.091822	-1.23632	-1.18559	-3.70896	4.18514	5.24612e-07	0.00044766	1.0029	1.32963	3.02146	6.02827
Plagl1	0.1237	0.304487	-1.06821	1.09859	-1.22012	1.81669	0.000492327	0.0375116	-1.17748	1.34604	1.77272	5.74029
Vmn1r121	0.251657	0.432507	-4.21494	2.47218	2.29757	-1.19351	0.000323353	0.0300227	-1.90859	1.94981	2.54396	5.63331
Vmn1r183	0.35709	0.524403	-3.88982	1.38493	2.33311	1.03903	0.000476943	0.0367335	-2.33269	1.87524	1.3932	5.62357
Nov	0.051065	0.216038	-1.11477	-1.65745	-2.3489	1.56289	1.26286e-08	2.7156e-05	1.6647	2.81784	8.07018	5.46164
Spin2d	0.48422	0.627519	-3.44519	1.80134	1.5791	1.09844	0.000253711	0.026484	-3.23884	1.36408	1.47614	5.18515
Vmn1r104	0.310969	0.485032	-3.55466	2.50885	1.81736	-1.32575	1.14108e-05	0.00403573	-2.23095	1.48531	3.45221	5.03851
Sparc	0.217477	0.400879	-1.18668	-1.179	-1.09326	2.21541	1.42299e-09	5.09991e-06	1.04779	1.30964	9.15285	4.94234
Sema4a	0.158738	0.342549	2.63749	-1.6921	-1.58569	2.78679	4.37488e-06	0.00204061	1.14188	1.63658	5.09939	4.93569
Vmn1r77	0.00829012	0.157393	-8.54204	-1.05053	-1.13286	-1.48212	0.000298877	0.0290024	1.00868	1.01244	2.03821	4.91368
Scgb2b7	0.463622	0.611509	-3.81767	2.0455	1.28256	-1.27402	0.000176723	0.0211542	-2.40049	1.68433	2.07485	4.51144
Speer4d	0.569951	0.692211	-2.61455	1.61831	1.35027	-1.14738	9.10131e-06	0.00359763	-2.80923	1.26652	2.18804	4.3929
Ccdc64	0.0209971	0.174626	1.36607	-1.10368	-1.20998	7.70359	2.13501e-05	0.00588728	5.72849	3.65896	5.61793	4.30058
Rps6ka6	0.024551	0.18026	-1.07085	-3.38166	-1.58838	-1.40632	4.51307e-05	0.00958964	1.17022	1.05134	2.95904	4.24991
Dlk1	0.000557307	0.131521	1.06164	-1.50559	-1.38689	3.20952	1.47925e-08	2.84011e-05	1.00101	1.35191	3.80389	4.13984
1700016D02Rik	0.335915	0.506411	-5.08711	1.40161	1.2203	-1.12261	0.000276224	0.0277897	-2.72288	1.20522	2.14659	4.12858
Ndnf	0.866189	0.906596	1.22603	-1.11375	-1.34265	-1.3247	3.23773e-05	0.00756771	2.11157	2.64085	10.1419	4.10841
Vmn1r101	0.434918	0.587893	-3.0732	1.73039	2.15503	-1.00212	0.000748878	0.0482143	-2.52994	1.61238	1.58466	3.99544
Speer4b	0.393322	0.554233	-3.18503	1.78542	1.43652	-1.70906	0.000176595	0.0211542	-2.94735	1.27506	1.58241	3.99058
Slfn2	0.136393	0.318894	1.19953	-1.0906	1.14383	1.79107	7.35702e-11	3.95506e-07	-1.01063	1.9916	5.16473	3.98326
Myl10	0.261683	0.441553	1.68542	-1.10427	3.86625	1.31157	0.000266998	0.0272364	1.93046	2.50441	1.97791	3.84265
Adamts17	0.00696672	0.156385	2.71145	-3.67147	4.483	-2.22261	1.98909e-05	0.00570243	1.04397	3.21049	21.0055	3.76849
Vmn1r124	0.147038	0.330932	-3.95351	1.58386	3.16178	-1.20221	0.000390786	0.0330012	-2.4876	1.53035	1.05802	3.7508
Sgcg	0.0317791	0.191592	-2.18281	2.13365	2.02638	-1.42576	5.67557e-05	0.0106395	-2.58399	1.45967	1.54276	3.69645
Mboat2	0.144124	0.327292	1.0927	-1.73228	1.06644	-1.45912	2.99093e-07	0.000292345	-1.03609	1.73505	9.84063	3.68129
Camk2b	0.0367264	0.197615	-1.00431	-1.19283	-1.90621	-1.05867	2.4265e-05	0.00642592	-1.14136	1.65595	5.47122	3.58581
Vmn2r35	0.297554	0.473321	-2.32272	-1.01298	1.41062	-1.77606	0.000270972	0.0275372	1.23116	1.37018	5.74283	3.57854
Tnfsf13os	0.0476433	0.211813	1.61883	-1.4022	2.59762	-1.3359	0.000417647	0.0339814	1.4523	1.06912	1.261	3.46667
Speer5-ps1	0.343661	0.51292	-2.63308	1.34699	1.32361	1.03486	0.000144133	0.018626	-1.61507	1.07719	1.37327	3.41007
Lrrc3b	0.177552	0.36286	-1.84458	2.06537	2.85614	-2.39467	0.000485068	0.0371994	-1.61199	1.00143	3.46781	3.38277
1700047E10Rik	0.117567	0.29776	-3.92418	1.56358	1.79545	-1.36119	9.14144e-05	0.0142033	-2.19978	1.16329	2.22677	3.34889
Olfr805	0.137631	0.320131	-1.0053	1.20719	1.46388	-1.12351	6.13798e-06	0.0026827	-1.19383	1.40976	1.05316	3.18763
Dio1	0.195456	0.3809	-3.30048	1.42202	1.67332	-1.38682	0.000199486	0.0227248	-3.54936	1.09884	1.08454	3.18716
Gimap4	0.00179645	0.144755	1.3207	-1.18303	-2.89237	1.2021	0.000116835	0.0165723	1.17848	1.14828	1.71752	3.18307
Speer5-ps1	0.214016	0.39768	-2.61596	2.06343	1.4148	-1.21101	0.000669152	0.0450789	-1.61911	1.092	1.262	3.16587
5031410I06Rik	0.489804	0.631918	-1.99393	1.92461	1.09329	1.0068	2.92236e-05	0.00714104	-1.51491	1.11778	1.50322	3.15085
Olfr1380	0.097237	0.273956	-3.19905	1.29315	2.24383	-1.21971	5.13298e-05	0.010145	-2.87156	-1.06118	2.44123	3.1278
Ctsg	0.95505	0.970191	1.07425	-1.00818	1.10908	-1.06279	6.13893e-07	0.000500034	-1.1244	-1.24796	5.82742	3.07237
Rgs7bp	0.00459612	0.151631	1.39917	-2.07731	-1.35569	1.95899	1.35355e-05	0.00449909	1.34443	1.21767	1.6939	3.02152
Prom1	0.731149	0.809745	1.0684	1.21247	1.5867	-1.12241	0.000293745	0.028798	-1.29403	1.15764	3.01404	3.01609
Speer4a	0.28281	0.460323	-2.45177	1.43461	1.38187	-1.17871	0.000297013	0.0288737	-1.35327	1.02958	1.32413	2.98742
Hoxc4	0.249324	0.429845	-1.1136	1.18034	1.20585	-1.22108	1.2386e-06	0.000864749	-1.23202	1.43455	1.02879	2.94186
Rab44	0.161939	0.345862	2.10454	-1.23314	1.26507	-1.2403	4.95017e-10	2.04705e-06	2.01786	1.0517	4.90768	2.9145
Skida1	0.0523622	0.217799	1.08907	1.42925	-1.27732	1.66779	4.04372e-06	0.00195843	1.32297	1.23213	2.52914	2.89523
F13a1	0.603221	0.717398	-1.95871	1.5247	1.27586	3.47559	0.000197813	0.0227248	-3.47325	-3.00908	4.21641	2.87333
Zfp352	0.00632874	0.155708	1.10634	1.18745	2.0408	1.37465	0.00012512	0.0170286	-1.00533	2.0375	1.51584	2.76191
Tlr4	0.327027	0.498911	-1.35005	1.64839	-1.94569	-1.09691	0.000320554	0.0300158	-1.54364	2.42306	2.1	2.73448
Hp	0.42029	0.576519	-1.19746	1.45626	1.01696	1.1148	2.03232e-05	0.00572019	-1.69013	-1.30749	3.94636	2.70218
Rab11fip4	0.574464	0.695633	-2.03762	1.28567	1.50229	1.02215	0.000301098	0.0290606	-2.2662	1.32551	1.00075	2.66785
B230307C23Rik	0.176257	0.361409	-2.23192	-1.33456	1.41435	-1.57298	0.000303497	0.0290832	1.15598	1.41013	5.26233	2.66733
Olfr704	0.109292	0.287843	1.15536	1.4279	1.0594	-1.37077	0.000494722	0.0375116	1.15637	1.18536	1.82054	2.59352
Ccdc177	0.591988	0.708616	-1.44555	1.54688	1.74314	1.04427	0.000658074	0.0447296	1.74858	-1.29802	1.78257	2.58852
Nhsl2	0.32862	0.500299	1.05888	-1.42377	1.30949	-1.55944	2.11691e-06	0.00125058	1.92587	-1.10555	6.75023	2.58293
Fsip2	0.24556	0.426138	-1.30711	1.57567	2.47945	-1.64159	0.000682114	0.0454396	-2.40107	1.1607	3.57103	2.57162
Vmn2r13	0.253402	0.434091	-2.25511	1.59994	1.5545	-1.27751	0.000766837	0.0487286	-1.64616	1.11538	1.85195	2.55961
Orly	0.0660406	0.235961	-7.45856	-1.13486	1.18089	-2.41001	0.000518702	0.0386898	-7.68328	1.21163	2.41192	2.55176
Vmn2r12	0.333433	0.504347	-2.3009	1.4528	1.39755	-1.22102	0.000292079	0.0287757	-1.75218	1.14525	1.97489	2.4987
Lrp12	0.186221	0.371508	1.1786	-1.2568	-1.45176	-1.04322	2.16504e-06	0.00126511	1.31654	1.22448	2.18726	2.48195
Vmn2r113	0.0859118	0.260078	-2.22295	1.68997	1.36509	-1.15945	7.8755e-06	0.00333369	-1.65901	1.19621	1.55717	2.46511
Stk39	0.0636528	0.232878	-2.72733	-4.00754	-2.76817	-1.10773	1.10595e-05	0.00393742	1.22439	-1.08326	8.90596	2.45519
Cish	0.00433521	0.151631	1.20786	-1.29291	1.12603	-1.67057	1.01814e-06	0.000760195	1.40233	1.75686	3.90206	2.44613
Cdkl3	0.282292	0.459807	-1.13179	1.31777	1.36219	-1.19515	5.38368e-06	0.00245272	-1.27739	1.3277	-1.07007	2.42811
Vmn1r139	0.113022	0.292276	-2.03623	1.41941	1.7155	-1.19483	0.000214463	0.0237587	-1.67047	1.22321	1.63079	2.4039
1700119I11Rik	0.0664871	0.236467	-2.60812	-1.07988	2.73418	-1.28673	0.000727409	0.0472851	-1.44781	1.52359	-2.70167	2.34822
Pam	0.0609111	0.229361	-1.96741	1.39791	1.07265	-1.64776	0.000427907	0.0344886	-1.60929	1.12072	1.15056	2.33764
C130026I21Rik	0.206138	0.391011	-2.49722	1.20128	1.30677	-1.1579	0.000124011	0.0169637	-1.67064	1.22635	1.44763	2.31843
Dlk1	0.0632462	0.232199	-1.04759	-1.30828	-1.34793	1.86302	3.95407e-10	1.77139e-06	1.08179	1.08303	4.05588	2.28588
Myo10	0.19553	0.38099	1.22177	-1.04432	1.42408	1.32592	1.40094e-06	0.000941415	1.1353	1.9926	2.82361	2.28125
Vmn1r131	0.150672	0.334713	-2.06319	1.24969	1.53509	-1.29402	0.00024555	0.0258833	-1.52536	1.24989	1.56642	2.25812
Tubb2b	0.887342	0.921825	-1.27662	-1.10775	1.10315	-1.03182	2.82546e-05	0.00701025	1.33221	1.63376	2.69309	2.25668
Vmn1r151	0.156769	0.340629	-2.03715	1.35055	1.50111	-1.29003	0.000379435	0.0324028	-1.47432	1.30908	1.53753	2.21096
Plxdc2	0.545485	0.674318	1.1632	1.00919	1.04124	-1.09223	7.55845e-08	9.67464e-05	1.18497	-1.02612	1.77931	2.1489
Nlrp9c	0.0515361	0.216415	-2.17792	1.37445	1.37183	-1.14452	0.000292794	0.0287757	-1.31401	1.64499	1.41176	2.14767
Psg28	0.33801	0.5081	-1.67759	1.10573	1.4377	-1.66565	0.000135773	0.0177511	-3.0355	1.12566	1.99043	2.11613
Tshz2	0.138729	0.321517	-1.29458	2.14369	1.35065	-1.44008	0.000455198	0.0356201	-1.10973	1.73861	1.7562	2.08901
Adamts4	0.0426465	0.205797	-1.59164	1.99439	1.62665	-1.30852	0.000201178	0.0228167	-1.74378	1.28367	1.12384	2.08676
Cacfd1	0.241363	0.422227	-1.95837	1.7263	1.3633	-1.18343	0.000597561	0.0423245	-1.6113	1.29072	1.13923	2.07358
Mycn	0.243268	0.424001	-1.09956	-1.4401	-1.48147	1.27312	0.000186917	0.0217971	-1.04725	1.07854	1.2612	2.0569
Tgm1	0.000564064	0.131521	1.02015	1.22637	-1.44138	2.03634	8.91144e-06	0.00359763	1.03102	1.50906	1.79652	2.02887
Rgcc	0.886022	0.920899	1.10645	-1.33732	1.16117	1.14966	0.000517005	0.038656	1.40893	1.28734	2.17081	2.01859
Klf9	0.762769	0.832552	1.00286	-1.33713	1.54025	1.38326	0.000559237	0.0401389	2.09009	1.03463	12.576	2.01061
1700066C05Rik	0.563452	0.687486	-1.45632	1.00434	1.02664	-1.05326	6.99563e-05	0.012083	-1.31069	1.46912	1.48902	2.00531
Il18r1	0.241685	0.422583	-1.02945	1.57375	2.15169	-5.26962	0.000331048	0.0305263	1.071	1.23029	11.8542	1.99882
Vegfa	0.0114457	0.160137	1.08525	-1.14363	-2.03951	1.54989	0.000437968	0.0350183	1.04474	1.53097	1.45348	1.97589
Lrp1	0.465316	0.61272	-2.04218	1.032	2.22564	1.05393	1.56441e-05	0.00483341	-1.42539	2.07061	4.51306	1.9681
Ica1	0.000674758	0.135774	1.06027	-1.36061	2.15932	1.53749	0.00044511	0.0351375	1.39303	1.67186	1.66184	1.96476
Adamts17	0.0925337	0.268096	1.03804	-1.13833	1.95994	-1.40063	3.56702e-06	0.00179215	-1.11204	2.04803	3.55491	1.96326
Rasgrf2	0.110711	0.28965	1.17468	-1.55386	-1.34581	1.40983	6.85732e-05	0.0119884	1.07193	2.25486	2.49849	1.95959
Kcnk6	0.46301	0.611075	1.17897	-1.45356	-1.58539	1.00431	1.74265e-06	0.00110215	1.26819	1.30307	12.4298	1.90108
Pde3b	0.738997	0.815497	-1.11867	-1.74995	-2.08408	-1.01225	0.00034208	0.0309227	1.21036	1.81526	10.1796	1.87326
Csf2rb2	0.0762916	0.248869	1.31303	1.1187	-1.65631	1.11711	7.09869e-06	0.00302872	1.12187	-1.04496	2.08409	1.87108
Mfsd2a	0.387452	0.549723	1.52771	2.30967	1.11731	-1.02728	3.53062e-06	0.00179059	1.38044	3.61342	2.72785	1.85763
Bhlhe40	0.402853	0.561821	1.24386	-1.00599	1.01675	1.65886	0.000396542	0.0331956	1.76116	1.73743	2.54918	1.85571
Csf2rb	0.000229994	0.117753	1.40398	1.10166	-1.24866	2.00781	3.74706e-08	5.75538e-05	1.0728	1.41003	1.53683	1.84936
Cers6	0.219867	0.403297	1.1241	-1.70732	-1.76229	1.33656	0.00011251	0.0160863	1.69146	1.35581	8.49114	1.8492
Hmga2	9.44326e-05	0.101532	1.05986	-1.05645	-2.4104	2.27874	1.23885e-07	0.000141701	1.06984	1.01394	1.14562	1.83881
Hmga2	7.8351e-05	0.091822	-1.04225	-1.46123	-3.76448	2.49797	1.48813e-05	0.00476192	1.17548	1.09344	1.4655	1.82513
Serpina3f	0.121182	0.301694	-1.21554	1.25587	1.33138	-1.02064	1.26539e-05	0.00427837	1.01336	1.13822	2.27065	1.80807
Rogdi	0.000469307	0.123988	1.06614	-1.54212	-1.36746	2.04565	0.000349704	0.0311717	-1.07179	1.34548	1.33348	1.79963
Nhsl2	0.213291	0.397178	1.13108	-1.07057	1.53893	1.16141	2.76812e-05	0.00695379	1.35306	1.24199	3.11187	1.79751
Vit	0.631955	0.737988	-1.20583	1.4143	1.38909	1.57655	9.25082e-05	0.0142135	-1.44138	-2.15676	13.8447	1.79228
S1pr3	0.906832	0.936031	1.07865	-1.03501	1.11984	-1.13325	1.65379e-07	0.00018144	1.05059	1.72958	5.32287	1.7916
Cox16	9.01105e-06	0.0516598	1.0042	-1.21346	-2.84879	1.77689	8.3967e-06	0.0034723	1.0529	1.02484	1.14234	1.77298
Csf2rb	0.0303907	0.189398	1.23523	-1.26535	-1.46693	1.49028	7.76662e-05	0.0127696	1.37031	1.08181	2.02294	1.77052
Ikzf4	0.500581	0.639895	-1.04643	1.4013	1.12742	-1.08963	1.18022e-05	0.0040934	1.23275	1.4506	2.28659	1.73902
Hhla1	0.0949296	0.270962	-1.49099	1.98563	2.71424	-1.47535	0.000635875	0.0438819	1.03629	1.0016	1.50934	1.71871
B4galnt4	0.176419	0.361508	1.69357	-1.27879	-1.15578	1.37404	0.000435323	0.0349291	1.08112	1.63713	2.11084	1.68827
Cc2d2a	0.00236769	0.146483	1.25002	-1.30833	-1.18333	-1.57734	0.000226176	0.0245636	1.14411	1.11277	2.21631	1.67501
Lrp1	0.75612	0.827682	-1.11829	1.21668	1.04071	1.3036	1.81708e-09	5.74615e-06	-1.17668	1.75851	3.02163	1.67475
Cdkn1a	0.385153	0.548027	-1.08031	-1.16544	1.13766	2.09112	6.24215e-05	0.0112608	1.13041	1.45887	2.23461	1.6445
Mcf2l	0.143842	0.326912	1.09458	-1.27893	-1.78825	1.11005	1.61959e-05	0.00495884	-1.04138	-1.26289	2.92634	1.64151
Zbtb7b	0.0675874	0.237839	1.61872	-1.10159	-1.10307	1.0967	3.86312e-06	0.0019053	-1.08099	-1.17866	2.25987	1.62023
Agrn	0.000114611	0.103059	1.19964	1.21089	1.57012	1.68902	0.000104379	0.0153243	-1.02884	1.73568	2.40254	1.60192
Vmn1r65	0.128437	0.309986	-1.55922	1.31856	1.20817	-1.24156	0.000154275	0.0194687	-1.19987	1.24155	2.80043	1.59934
Rab23	0.222136	0.405316	1.21481	-1.14784	1.13018	1.27353	8.5475e-05	0.0136352	1.19916	1.4596	2.37602	1.56515
Elovl7	0.125102	0.305727	1.04341	-1.9745	1.05499	1.5184	0.000585191	0.0416679	1.52138	1.16167	2.36032	1.54903
Rfx3	0.765557	0.834291	1.80785	-1.35151	1.06434	1.38017	0.000560712	0.0401911	1.65537	-1.21161	7.10456	1.518
Gstm2	0.496467	0.636926	1.36026	-1.0786	1.16842	-1.34899	0.000623614	0.0436354	1.59602	2.78525	3.89639	1.51522
Clec10a	0.133039	0.314957	1.51556	-1.09857	-1.34669	1.34431	0.000391037	0.0330012	1.39127	1.26335	2.12856	1.5128
Csf1r	0.460548	0.609286	1.0196	2.01354	1.14047	2.61135	0.000672297	0.0451211	-1.1488	-1.08681	1.81127	1.499
Ifitm1	0.697325	0.785312	1.04688	-1.1635	-1.02128	-1.03905	3.59054e-08	5.69579e-05	1.20708	1.17137	2.34059	1.4963
Tspan7	0.0151447	0.164646	1.73217	-2.33021	-10.4875	1.664	0.000458441	0.0357847	1.70387	3.02924	13.3635	1.47503
4930465K10Rik	0.278867	0.456623	-1.67538	-3.06594	-1.23289	-1.26857	5.15573e-05	0.0101526	1.00877	5.74789	-1.54602	1.45805
Flrt3	0.0302803	0.189337	-1.03518	-1.49558	-2.11352	1.31501	0.000670411	0.0451072	1.48707	1.79304	2.2406	1.42245
Irf8	0.0687675	0.239206	1.12543	1.0718	-1.7383	1.38656	2.68875e-06	0.00145324	-1.06864	1.24995	2.54906	1.41873
Phip	0.0670132	0.237166	2.03903	1.19526	-3.28926	1.23741	0.000787025	0.049492	3.36479	-2.94967	1.85196	1.39829
Hpse	0.00158617	0.144755	1.50758	-1.76235	1.05318	1.65377	0.00055722	0.0400843	1.00988	-1.06792	2.29911	1.35327
Dnajb2	0.00120222	0.144755	1.51144	1.31261	1.3566	1.76311	0.000459106	0.0357847	-1.00446	2.28216	-1.27798	1.35186
Ifitm1	0.93398	0.954959	1.05413	-1.05361	1.0205	-1.02601	3.03653e-08	5.20886e-05	1.19908	1.15513	2.30444	1.35128
Fcer2a	0.0229712	0.177623	1.38941	1.81958	3.6341	1.08367	3.08232e-05	0.00739742	1.54598	2.21683	1.89997	1.32503
9030417H13Rik	0.157776	0.341503	-2.53419	-1.34284	-1.28094	1.30989	0.000318083	0.0298948	-2.56059	-1.80804	2.89024	1.31279
Mpo	0.00543664	0.153137	1.10826	-1.88628	1.71274	3.05628	0.000678428	0.0453855	-1.03656	1.06216	1.95044	1.27903
6720475J19Rik	0.959315	0.973174	-1.03476	-1.06895	1.00926	1.11404	1.24439e-05	0.00425756	1.11497	1.44638	2.04143	1.26545
Htra3	0.640938	0.744709	1.14159	1.33998	1.00553	1.3565	0.000348548	0.0311256	-1.01755	1.56076	2.89334	1.25513
Gvin1	0.601169	0.715813	1.34378	-1.66876	-1.02461	1.0399	4.04534e-07	0.000371959	1.16461	-1.14348	2.95164	1.24937
Atp8b4	0.0498074	0.214401	-1.10198	1.75956	1.25884	-1.2063	6.93946e-07	0.000540664	-1.18935	1.10874	2.64836	1.22614
Tfpi	0.0148356	0.16423	3.34631	-2.57598	-2.40189	-1.79234	0.000413819	0.0338607	3.65294	-1.81453	4.3785	1.2212
Ifitm3	0.151968	0.335964	1.06354	-1.31843	1.07729	1.15188	1.4755e-08	2.84011e-05	1.09477	1.04189	2.00672	1.19837
Gbp7	0.199969	0.385202	1.04391	-1.662	-1.16882	1.31594	0.000508812	0.0383099	1.49646	1.26652	2.08608	1.18639
Tmem119	0.0908016	0.266127	1.07486	-1.5797	-1.42316	1.39568	0.000119216	0.0166191	-1.20449	1.1158	2.78297	1.1845
Fanca	0.178895	0.364151	-1.62711	-1.03639	-1.59333	1.04581	0.000621487	0.0436169	1.80344	2.4564	-1.14838	1.17179
Ttyh2	0.118514	0.298921	1.40172	-1.8077	1.32213	1.15894	0.000204289	0.0230146	1.37461	1.28294	2.52589	1.16044
1500002F19Rik	0.61537	0.726176	1.01854	-1.27385	-1.23518	-1.02159	0.000142864	0.0185065	-1.15369	2.25901	1.4226	1.14296
Dtx4	0.0123015	0.160923	-1.11321	2.15034	1.64237	-1.35548	0.000678769	0.0453855	-1.01806	-1.10473	1.88022	1.13369
Alad	0.139147	0.321769	-1.34602	-1.21119	1.5284	-1.11384	0.00011938	0.0166191	-1.01154	1.93017	2.47571	1.1331
Rasip1	0.4867	0.629403	1.10615	1.02546	-1.42998	1.18526	0.000759596	0.0484978	-1.50017	2.38342	1.31335	1.11786
Emr1	0.762019	0.832071	1.92077	-1.01634	-1.30509	1.02476	0.000167085	0.0205075	-1.14186	1.14249	3.28842	1.11472
Cetn4	0.198433	0.383593	-1.50212	-1.43798	1.0423	-1.19368	0.000791511	0.0496509	-1.02386	-1.30825	2.05583	1.09043
Mpo	0.0871289	0.2615	1.141	-2.27214	-1.0249	3.24987	0.000650492	0.0444343	1.25156	-1.04229	1.66929	1.08651
Rnf217	0.184787	0.36998	1.04309	-1.77389	1.0955	1.04553	0.000600461	0.0424181	1.39139	1.12557	3.25345	1.08285
Mtm1	0.0621987	0.230843	1.13162	1.17396	-2.19864	1.14317	3.06494e-06	0.00161537	5.36164	1.21533	15.3887	1.06873
Ms4a4b	0.025492	0.181917	1.80107	-1.89209	-4.52973	3.63731	0.000146412	0.0187851	-1.06977	-1.42524	3.42673	1.06869
Oas1a	0.193685	0.37932	-1.01224	-1.45464	-1.04928	1.36141	2.45699e-05	0.00644458	1.06955	-1.23228	2.42835	1.03446
Amer1	0.102653	0.27993	1.19288	-1.27682	-1.18062	-1.68476	0.000542541	0.0395986	1.86409	-1.10271	2.45057	1.02321
Ms4a4b	0.268584	0.447366	1.20826	1.53628	-1.45516	1.09577	0.000123298	0.0169453	1.00715	-1.32111	2.38025	-1.04234
Osbpl5	0.00518247	0.153137	1.31073	-1.09512	-1.05847	-1.81551	0.000675759	0.0452969	1.00605	-1.0182	2.2142	-1.0511
Oas1a	0.0495932	0.214238	1.04972	-1.38642	-1.13165	1.59863	0.000152194	0.0192513	1.06792	-1.18101	2.52633	-1.06931
Snx16	0.178617	0.363971	-1.1134	-1.23396	-1.58384	1.65611	0.000468788	0.0363135	-1.34348	1.28998	-2.60327	-1.07375
Ifit3	0.164459	0.348599	-1.60084	-1.68598	1.04959	2.17719	0.000272949	0.0275817	1.88409	-1.49376	6.68773	-1.11231
Farsa	0.176022	0.361244	1.05819	-1.31823	-1.21073	1.14329	0.000745186	0.0481274	1.46348	1.62744	2.14914	-1.13597
Usp18	0.121957	0.302581	1.04843	-1.2295	1.36827	1.61537	0.000785328	0.049492	1.07228	-1.3038	2.34591	-1.13739
Olfr259	0.510859	0.647795	1.29005	-1.52385	1.13167	-1.02096	0.000447067	0.0351475	1.36356	4.36239	1.51994	-1.13889
Nkx6-2	0.0878335	0.262179	1.73239	1.38799	-1.73811	2.02022	6.61917e-05	0.0117053	-5.46438	1.14929	-1.39678	-1.1614
Tex33	0.354529	0.522124	1.30988	1.50971	-1.03375	-1.29258	3.23667e-05	0.00756771	1.05596	-1.33312	-2.94185	-1.2034
Smim8	0.0381026	0.199665	1.12686	-1.2693	-1.88213	1.53724	0.000792822	0.0496752	-1.4553	-1.10613	-2.51692	-1.21011
Cds2	0.35054	0.518666	1.28481	-1.29948	1.15754	-1.24036	0.000720406	0.0470639	1.84961	-1.07889	2.1708	-1.21497
F830016B08Rik	0.728786	0.80801	1.53186	-1.03536	1.00631	1.19473	0.000199715	0.0227248	-3.00075	1.26487	31.3811	-1.26925
Perm1	0.0135807	0.163284	1.37979	-1.546	-1.04567	1.45055	0.00035079	0.0311717	2.1255	1.27041	1.69578	-1.28216
Samhd1	0.0295029	0.188176	1.36542	-1.69298	-1.45245	1.42879	0.000125515	0.0170393	1.95506	-1.1803	2.25234	-1.30605
Irgm2	0.336212	0.506603	1.18323	-1.28942	1.30618	-1.25274	0.000175183	0.0210686	1.3659	-1.56936	2.13027	-1.31522
Cnn3	5.66361e-05	0.0824435	-1.08864	-1.61926	-2.3287	1.06916	1.93153e-05	0.00562239	-1.03623	-1.21104	-1.85477	-1.31734
Alox12	0.660862	0.75874	-1.27725	1.17759	1.57209	2.234	0.000448682	0.0352127	-7.12828	-3.60039	-9.88073	-1.36409
Gpr4	0.063157	0.232119	1.12722	1.53925	1.32503	1.45384	0.000145379	0.0187209	-1.42612	1.0914	-2.09869	-1.42674
Hist2h4	0.0203413	0.173649	1.33647	-1.25418	-1.27145	2.56115	0.000436416	0.0349646	-1.4035	1.1658	-2.32678	-1.44741
Ptpn4	0.797879	0.857795	1.09822	-1.17431	-1.18849	-1.78863	0.000131091	0.0174551	6.47525	1.96537	2.73118	-1.44803
Zfp112	0.393543	0.554458	1.79207	-1.33423	-1.27125	-1.01816	0.000765367	0.0487286	1.12288	-2.11372	-4.58015	-1.47551
4930412M03Rik	0.0444041	0.207855	1.67414	-1.88119	-1.27369	1.58428	0.000724181	0.0472467	1.82487	2.58709	1.48158	-1.49515
Etv5	0.0017546	0.144755	-1.03308	-1.17311	-1.10135	-1.85787	5.62004e-09	1.4387e-05	-1.00872	-1.41937	-2.31679	-1.51727
Sept1	0.114281	0.293658	1.13296	-1.18382	-1.47121	1.28858	0.000782814	0.0493935	-1.0914	-1.13391	-2.13088	-1.52006
Hist1h2bb	0.00163023	0.144755	1.24544	-1.72307	-1.30926	2.52294	5.75517e-05	0.0107056	-1.41382	-1.01893	-1.84002	-1.53164
Rbm47	0.0535132	0.219053	1.22797	-1.49883	-2.27787	1.16624	0.000222553	0.0243176	-1.05152	-1.58458	-1.81274	-1.53499
Hist3h2bb-ps	0.000240946	0.117753	1.89343	-1.16336	-1.1235	3.53018	0.000185852	0.02172	-1.41532	-1.4412	-2.63172	-1.53714
Upp1	0.509462	0.646603	1.1317	-1.40453	1.29817	-1.57801	0.000266485	0.0272364	-2.49001	-1.81301	-2.91939	-1.55025
Ipcef1	0.0287322	0.187218	1.17789	-2.05174	-1.08884	1.40642	1.23039e-05	0.00424002	1.05993	-1.88216	-1.51057	-1.58622
Jdp2	0.506041	0.64401	1.11462	-1.12525	1.23911	1.27853	1.78346e-05	0.00529708	-1.0977	-1.40831	-2.29353	-1.60897
Msrb3	0.000413506	0.122816	1.03473	-1.14007	-2.46122	1.43042	1.99679e-05	0.00570243	-1.06655	-1.46919	-2.51008	-1.61323
Cobll1	0.00722434	0.157093	1.04384	-2.56823	-1.54617	-1.43484	0.000191514	0.0221888	1.4148	-1.767	-1.57955	-1.62972
Wfdc2	0.264878	0.444473	1.28719	1.19981	1.17147	-1.13565	1.81709e-05	0.00536731	-1.34016	-1.33439	-2.09312	-1.64416
Mx1	0.0383609	0.200111	1.39351	-2.56171	-3.47382	3.94327	7.72774e-05	0.0127696	3.63801	-1.00558	8.88582	-1.657
Rdh12	0.709066	0.793689	-1.01143	1.0599	1.22292	1.1251	0.000441293	0.0350189	-1.40221	-1.43415	-2.40875	-1.68005
Osgin1	0.460142	0.609033	1.19106	1.12277	-1.21276	-1.00755	1.3466e-06	0.000928102	-1.11926	-1.33316	-2.58858	-1.68646
Wdr35	0.194463	0.379983	1.81322	-1.99207	-1.4587	1.42627	2.35621e-05	0.00633337	-1.06894	-1.06576	-6.54613	-1.68853
Clec4e	0.023405	0.177993	-1.13658	-1.9527	-5.01471	1.49105	0.000412954	0.0338415	1.02269	-2.24517	-2.00952	-1.72745
Gas6	0.00569918	0.153606	1.05416	1.64069	1.38056	-2.1393	2.46798e-06	0.00139659	-1.19638	-1.02902	-1.53449	-1.7632
Hist2h2ab	0.0215014	0.175248	1.76926	-1.42278	-1.17646	2.60807	0.000405686	0.0336563	-1.40233	-1.02968	-3.04831	-1.78336
Olfr920	0.202233	0.387068	1.31318	1.71626	1.98148	1.04255	0.000120024	0.0166298	-1.3466	-1.09649	-3.37362	-1.79403
Pld3	0.179516	0.364834	1.1427	-1.39277	-1.48986	1.15174	5.81453e-05	0.0107417	-1.11917	-1.245	-2.32428	-1.82931
Pcp4l1	0.0925849	0.268129	-1.03667	-1.02753	1.12566	-1.79732	0.000187335	0.0217986	-1.14733	1.01291	-3.10198	-1.83334
Fbxw24	0.00251952	0.147392	-1.3673	1.65537	1.95786	-1.02875	0.000290855	0.0287757	-1.26538	-1.3453	-2.22098	-1.86075
Dmwd	0.0345552	0.195029	1.061	-1.64654	-1.00687	-1.36505	4.86141e-08	7.06337e-05	1.00101	-1.20035	-3.16051	-1.87869
Tnfaip8l2	0.00133493	0.144755	1.63587	-7.05084	-4.43855	3.04492	0.000256345	0.0266554	-1.48855	-1.74817	-1.98275	-1.9123
Rasgrp3	0.00749125	0.157393	-1.03333	-3.1804	-2.55379	1.70096	0.000338257	0.0308095	-1.02103	-3.95733	-5.02752	-1.9171
Tespa1	0.00825681	0.157393	4.25478	-2.12692	-2.0093	2.10199	2.23709e-05	0.00604341	1.39291	-1.3959	-1.01659	-1.92656
Hlx	0.031048	0.190561	-1.24902	-1.10262	2.19366	1.63496	0.00034171	0.0309227	-1.09539	1.33503	-1.53198	-1.92733
Mapk12	0.0253655	0.181851	1.39966	1.31398	1.65632	-2.02251	0.000126461	0.0171245	-1.36595	-1.31203	-1.80563	-2.00365
Phf11c	0.227349	0.409778	1.43245	2.06409	-1.9634	1.08451	3.00486e-05	0.00727651	-1.09942	-1.13642	3.63378	-2.02073
Slc9a9	0.563197	0.687377	-1.27296	-1.39381	1.29927	1.52488	5.99801e-05	0.0109676	1.25922	-1.15863	-1.55797	-2.0216
Pydc3	0.024052	0.179671	-2.98815	-1.40371	2.291	4.33597	0.000540826	0.0395696	-2.59017	-1.5665	3.18066	-2.03251
Dusp6	0.100833	0.278085	-1.10911	-1.5165	-1.30254	-1.16936	2.4642e-09	7.35961e-06	-1.00821	-1.51524	-3.11423	-2.06179
Gem	0.0244886	0.180105	1.20752	-1.61827	-3.31816	1.57722	4.08221e-07	0.000371959	-1.12939	-2.01592	-5.03689	-2.07731
Hist1h4m	0.0217899	0.175786	1.58626	-1.18992	-1.03304	3.6873	0.000269547	0.0274442	-1.74448	1.07374	-3.49332	-2.08688
Cd52	0.000963224	0.140773	1.31267	-1.07105	-2.72433	1.89141	2.49509e-06	0.00139722	-1.09219	-1.29361	-1.5077	-2.09239
Pdgfrb	0.00414911	0.151631	1.28545	-1.80753	6.63314	-3.8919	4.70732e-06	0.00216291	2.55844	-1.41598	1.64221	-2.12494
2310040G07Rik	0.816404	0.870773	1.23068	-1.1702	1.15064	-1.99871	0.000441894	0.0350189	6.97341	3.13283	2.06719	-2.1745
S100a9	0.0333861	0.193635	-1.68484	-4.82648	6.99127	-3.79976	0.000629056	0.0436354	-12.5075	-1.62268	5.71127	-2.25965
Wfdc17	0.394744	0.555404	-1.14415	-1.0323	-1.13173	1.53987	0.000776279	0.0491497	-1.05008	-1.31344	-1.20109	-2.26553
Emp1	0.558972	0.684256	1.54628	1.52954	-1.54078	-1.15073	0.000169813	0.0207006	1.10096	-1.39573	-1.56345	-2.29148
Cd33	0.884999	0.920254	1.79421	1.05703	-1.11681	-1.18225	3.6527e-05	0.00825346	-1.05331	-1.19272	-1.78737	-2.29415
Gch1	0.012375	0.160923	-1.04749	-2.94866	-1.78848	-1.24385	4.73338e-05	0.00979008	1.14259	-1.59306	-2.79166	-2.2998
Cfc1	0.506324	0.644278	1.72543	1.18393	-1.30649	-1.61701	0.000342249	0.0309227	1.83385	-2.53513	-4.99939	-2.30552
Mn1	0.125711	0.30659	1.12904	-1.86953	-1.70104	-1.23192	2.40982e-05	0.00641335	1.08658	-1.33899	-1.34674	-2.42209
Actn2	0.444017	0.595586	1.87104	1.03008	1.05076	1.11791	4.11149e-05	0.00905858	1.09155	-1.05406	-1.13396	-2.47922
Epha7	0.118712	0.299131	1.46845	1.04229	-1.2271	1.34765	0.000744889	0.0481274	1.2834	1.02562	-1.28398	-2.48598
Atp8a2	0.124479	0.305105	2.13079	1.81795	-2.18673	1.04556	0.000338705	0.0308095	1.40098	-1.2188	1.15402	-2.53827
Tmem121	0.0985834	0.275763	-1.11259	-2.15227	1.00087	-1.31789	7.3497e-08	9.63689e-05	-1.06089	-1.21966	-2.85479	-2.54488
Tmem121	0.124799	0.305459	-1.25613	-1.98555	-1.02762	-1.22506	9.93011e-08	0.000124147	-1.0892	-1.23868	-2.83129	-2.6039
Apcdd1	0.444869	0.596221	-1.01139	1.01536	-1.07011	1.61911	1.12531e-07	0.000132502	1.19368	-1.39409	-1.81194	-2.64937
Gprc5b	0.0556043	0.222047	1.16627	-2.10433	-1.32961	1.71416	2.76159e-05	0.00695379	-1.06678	-2.79839	-1.90544	-2.69366
Cox6a2	0.898889	0.930101	-1.01215	1.13579	1.04584	-1.01226	7.62169e-07	0.000585335	-1.50825	-1.21601	-2.1493	-2.7391
Sstr2	0.0193448	0.171781	-1.21962	-2.99447	-1.86971	1.11777	1.64191e-05	0.00495884	1.22782	-1.15803	-2.20558	-2.73986
Hnf4a	0.069476	0.240197	1.32581	-1.52174	-2.05654	-1.31458	0.000291484	0.0287757	1.32544	-1.22538	-1.01906	-2.76739
Wfdc18	0.380265	0.543934	1.01724	1.04657	-1.41568	1.34812	3.12828e-06	0.00163275	-1.12064	-1.6158	-1.83129	-3.01608
Postn	0.00897489	0.157393	-1.06291	-2.24419	-3.73677	1.93722	1.61326e-06	0.00104587	-1.20198	-1.09073	-4.64258	-3.07089
Slc15a2	0.00420438	0.151631	1.87416	-1.40111	-2.36074	-5.14551	0.000248297	0.0260707	1.6077	-1.18001	2.53986	-3.08043
Aloxe3	0.0234991	0.178305	2.85889	-1.54134	1.43516	1.53281	9.56965e-05	0.014451	-2.8153	-1.04224	-6.12765	-3.35401
Sema3d	0.944975	0.963138	1.08181	1.07908	-1.14089	-1.46155	0.000770083	0.0488195	1.11239	-2.08869	-1.34629	-3.40144
Bcl6	0.0353832	0.196075	-1.203	1.62517	-1.11128	-2.46348	8.17489e-06	0.00340678	-1.55	-1.96218	-2.03188	-3.44117
Slc24a2	0.290434	0.467147	-1.47615	1.64448	1.23542	1.1405	9.32594e-05	0.0142739	1.4259	-1.14052	-2.58254	-3.53535
Etv1	0.243281	0.424008	-1.61073	-1.24816	-1.54247	-1.7534	0.000376251	0.0323841	-1.10828	-3.07022	-3.59828	-3.6914
Atp1b1	0.0496541	0.214315	1.84197	-1.75988	-2.19476	-1.19082	0.000126886	0.0171388	1.0553	-1.77026	-1.93308	-3.79148
Dusp4	0.139737	0.322354	1.22126	-1.67547	1.30238	-1.27449	1.8434e-07	0.000192921	-1.14817	-1.99818	-14.4321	-3.96742
Ddx4	0.00249401	0.147059	1.13534	-1.88118	-5.21109	1.18713	1.80841e-07	0.000192921	1.34211	-1.22848	-1.73781	-4.19174
Ccr9	0.59918	0.714311	-1.22385	-1.04587	-1.45279	1.08334	1.38163e-06	0.000940188	-1.0135	-1.39525	-2.32937	-4.35063
St8sia1	0.608912	0.721612	1.11826	-1.13435	-1.49364	1.40449	1.97176e-08	3.65516e-05	-1.32418	-1.7441	-7.08859	-4.79742
Vipr1	0.247915	0.428529	1.69316	-1.72289	-2.30285	1.16582	0.000346863	0.0311166	-1.70119	-1.68744	-5.15605	-5.01917
Oplah	0.620616	0.729898	1.48172	1.1114	1.35552	1.40295	0.000260873	0.0269909	1.55246	1.46849	-1.45953	-6.24066
Dzip1	0.207042	0.391814	1.33188	-1.28089	1.10714	-2.82547	5.74408e-08	8.05021e-05	1.00302	1.00504	-1.0962	-8.44832
Cpa3	0.0308821	0.190367	13.6338	-1.04563	-1.27158	1.11356	0.000526601	0.0388868	5.53131	-1.98911	2.76758	-9.41927
Il7r	0.776	0.841543	-1.02329	-1.00777	-1.28308	-1.0068	0.000718807	0.0470639	1.91118	-2.85295	-2.22809	-9.5943
Sdc4	0.803587	0.86169	-1.31607	-1.79569	1.02698	-1.43644	0.000800216	0.0497903	-1.42386	-2.75671	-5.54575	-9.93281
Gem	0.00381117	0.151047	1.11837	-1.63693	-7.89122	1.98818	1.6689e-12	1.12148e-08	-1.27469	-2.55138	-14.5727	-20.6694
