# Supplementary material for: Fetal and neonatal hematopoietic progenitors are functionally and transcriptionally resistant to Flt3-ITD mutations
Source: eLife. 2016 Nov 23;5:e18882. doi: 10.7554/eLife.18882 (PMC5153248; doi:10.7554/eLife.18882)
Supplement: Figure 7—source data 2. — These gene sets were determined by identifying genes that were more highly expressed in HSCs relative to HPCs (self-renewal) or HPCs relative to HSCs (commitment). In each case, a fold change threshold of five and an adjusted p-value threshold of <0.05 were used to define the lists. DOI: http://dx.doi.org/10.7554/eLife.18882.014 [file elife-18882-fig7-data2.xlsx]

## Sheet: Sheet1
Figure 7 - source data table 2. Self-renewal-related (HSC 5-fold ≥ HPC; adj.p<0.05) and Commitment-related (HPC 5-fold ≥ HSC; adj.p<0.05) gene sets
Self-renewal-related	Commitment-related
1700109K24Rik	2310075C17Rik
2010107G23Rik	2410018L13Rik
2900011O08Rik	2810417H13Rik
4631405K08Rik	5430435G22Rik
4930565N06Rik	9030617O03Rik
4932443I19Rik	9630023C09Rik
A230057D06Rik	AA467197
A230065H16Rik	AA619741
A730089K16Rik	AF303833
Abca5	AI504432
Abcg3	AK054031
Adamtsl5	AK077204
AI195381	AK082842
AK079655	AK157646
Akr1c19	Akna
Aldh1a1	Ap1s2
Ankrd63	Apcdd1
Arhgap29	Arhgdig
Arhgap8	Arl11
Arl13b	Atp1a3
Arsg	AY208318
Art4	Bard1
Asph	BC035044
B230369F24Rik	Best1
Bex4	Bex6
Btc	Btla
C030034E14Rik	C030010C08Rik
Car8	C030013G03Rik
Cask	C030034L19Rik
Cc2d2a	C1qc
Ccdc112	C230085N15Rik
Ccdc92	C330026H20Rik
Cd55	Camk1d
Ces1a	Car1
Ces2g	Ccl3
Cgn	Ccl9
Chchd7	Ccr9
Chd7	Cd160
Chst7	Cd300lb
Clec9a	Cd33
Col1a2	Cd48
Csgalnact1	Cd52
Cttn	Cd53
Cxadr	Cd69
Cyp26b1	Cd79a
Cyp4b1	Cdh18
D10Ertd755e	Cebpa
D630039A03Rik	Cebpd
Dach1	Chdh
Dennd5b	Clec4e
Dixdc1	Clnk
Dlg2	Cmah
Dlg5	Cnn3
Dnajb14	Cox6a2
Efcab4a	Cpa3
Efna1	Csf1r
Egr1	Cst7
Ehd3	Ctsg
Entpd3	Cxcr3
Epas1	Ddx4
Epb4.2	Dhrs3
Epor	Dntt
Eppk1	Dpp10
Eps8l3	Emp1
Fam110c	Evi2a
Fap	F13a1
Fas	Flt3
Faxc	Galnt3
Fjx1	Gapt
Fkbp10	Gcsam
Foxa3	Gen1
Foxq1	Gpr114
Fstl1	Gria2
Galntl6	H2-Ob
Gbp4	Hck
Gda	Hist1h3a
Gdf3	Hist1h3g
Gimap3	Hist1h3i
Glrx2	Hist1h4m
Glt1d1	Hist2h2ab
Gstm2	Hpse
Gstm6	I830077J02Rik
Hoxb8	Icos
Hoxc6	Ifi27l2a
Htr2c	Igll1
Ift43	Il10ra
Igf1	Il12a
Igf2bp2	Il17rb
Igsf10	Il1r1
Il22ra2	Il7r
Itgb3	Irf8
Itgb6	Itgal
Itpka	Itgax
Itsn1	Itgb5
Kazald1	Kcng1
Kdf1	Kcnq2
Keg1	Klhl30
Kif5c	Lag3
Klk12	Lrr1
Krtap6-5	Mlec
Lancl3	Mpeg1
Larp1b	Mpo
Ldb2	Mrvi1
Leprel1	Ms4a4c
Leprel4	Nkg7
Lhcgr	Olfr3
Lrrc39	Olfr645
Maff	Orm2
Mamdc2	Padi2
Mboat2	Pira11
Me1	Pira6
Med12l	Pira7
Meg3	Pirb
Mllt3	Plac8
Mlph	Plcd3
Morc4	Plekha6
Mtmr7	Pm20d1
Mtss1l	Postn
Mtus1	Prss57
Musk	Ptgir
Myo1d	Pydc3
Myo1e	Rab44
N28178	Rag2
Naip6	Rasal1
Nbea	Rbm47
Nckap1	Rgs8
Ndfip2	Rnf150
Ndnf	Rtkn2
Neil2	Satb1
Nlgn3	Sell
Notch3	Sema3d
Nphp3	Siglec5
Nrbp2	Siglecg
Nudt10	Slc16a11
Nudt11	Slc18a1
Nup62cl	Slc35d3
Odf3	Slc9a7
Olfr1413	Slc9a9
Olfr631	Speer1-ps1
Olfr681	Sstr2
Olfr704	St8sia1
Olfr820	Sulf2
Ophn1	Sv2a
Osbpl6	Svs2
P2ry1	T
Pbx1	Taar6
Pde6h	Tas2r130
Pdgfc	TC1614758
Perp	Tcte1
Pf4	Tespa1
Pfkfb2	Tex22
Pgr	Tff1
Phactr1	Tifab
Phlda2	Tlr7
Pigz	Tmem121
Plcb1	Tmem151b
Plcl1	Tmprss3
Plxna2	Tnfaip8l2
Porcn	Trim16
Ppp2r3a	Ttyh2
Prr15	Tyrobp
Rab40b	Ubash3a
Rarb	Vipr1
Raver2	Vit
Rbp4	Vmn2r89
Rbpms2	Vstm4
Rgmb	Wfdc17
Rhag	Wfdc18
Rhoj	Zfhx4
Rora
Rps6ka6
Runx1t1
Ryk
Scarf1
Scrn1
Sdpr
Sema7a
Setbp1
Sfrp2
Shprh
Skint3
Slamf1
Slc22a8
Slc27a6
Slc6a17
Slfn2
Slmo1
Smtnl1
Snhg18
Snrpn
Socs2
Sox6
Synm
Syt13
TC1588632
Tceal3
Tcf15
Tenm4
Tfpi
Tgfbr3
Tgm2
Tinagl1
Tma16
Tmco5
Tmem246
Tmem62
Tnfrsf25
Trim47
Trpc6
Tspan7
Ttc39b
Ubqln2
Upp1
Vmn1r168
Vwf
Xkr6
Yap1
Zfp612
Zfp711
Zfp772
