# Supplementary material for: Fetal and neonatal hematopoietic progenitors are functionally and transcriptionally resistant to Flt3-ITD mutations
Source: eLife. 2016 Nov 23;5:e18882. doi: 10.7554/eLife.18882 (PMC5153248; doi:10.7554/eLife.18882)
Supplement: Figure 8—source data 1. — Source data (log2) are shown for the 250 most differentially expressed probes in developing HSCs (228 unique genes). DOI: http://dx.doi.org/10.7554/eLife.18882.017 [file elife-18882-fig8-data1.xlsx]

## Sheet: Table S2
Figure 8 - source data table 1. Log base(2) expression values for the 250 most signficantly, differentially expressed transcripts in developing HSCs (representing 228 unique genes)
	HSCs																HPCs
Gene	E14.5				P0				P14				Adult			adj.p	E14.5				P0				P14			Adult				adj.p
H19	15.6409	15.6427	16.0101	15.3401	15.5381	15.0868	15.1404	14.5502	11.0049	11.0735	10.9177	10.8299	9.83136	9.95737	10.1872	7.86554e-11	13.7885	13.8227	14.6771	13.8854	12.8082	11.9075	11.856	11.7911	9.60124	10.0241	9.9077	9.73275	9.31639	10.8334	10.1479	1.14708e-06
Igf2	14.6099	14.7768	14.7671	14.4921	13.6317	13.3715	13.4227	13.426	9.28101	10.4072	8.94348	9.20679	8.36348	8.77632	7.95286	1.84034e-09	11.8668	12.0491	14.3316	12.9382	10.5164	8.81601	7.91754	8.96745	5.43077	7.01817	8.35297	4.66319	6.6974	9.90662	8.69553	0.00422059
Galnt6	10.9696	10.7421	10.6631	10.8299	12.2533	11.3354	11.9909	11.8852	14.342	14.197	13.9704	14.0621	15.2437	15.0523	15.0211	2.44204e-09	11.7082	11.8403	11.1901	11.8299	13.2714	12.3295	11.3941	12.3504	14.4029	14.0479	13.7548	14.6408	14.7578	14.7607	14.4814	1.27349e-05
Sdsl	12.5896	13.0575	12.9572	12.6614	13.4909	13.1907	13.4585	13.1219	15.2245	15.0683	15.2406	15.0182	15.9921	16.0867	15.8246	4.19612e-09	12.6759	12.3719	13.1073	12.8781	13.3665	12.6192	12.6438	12.4617	13.9067	13.3678	13.4914	14.9496	14.8619	14.8092	14.4052	3.11546e-05
Ptprb	11.2776	11.2596	11.1557	11.0853	10.0997	10.5955	11.2307	10.3699	8.14015	8.65826	7.69749	8.27713	4.5252	4.46961	4.82727	7.26919e-09	8.22221	8.75606	9.04412	8.91239	6.89338	5.1498	4.474	4.46955	4.48631	4.47874	4.56933	4.49041	4.51601	4.4709	4.52415	0.000103561
H19	16.2534	16.0661	16.4178	15.8512	16.1153	16.002	16.0436	15.7109	12.4081	13.1225	12.4157	12.386	9.94448	11.5351	10.5592	9.18908e-09	15.0264	14.987	15.6617	15.0523	14.1006	13.9446	13.7269	13.4971	11.3564	10.073	10.2022	9.42258	9.57068	12.8052	11.7135	0.000139117
Hmga2	16.051	16.136	16.0538	15.6363	15.6031	15.5396	15.7061	15.5982	14.8361	14.8156	14.0416	14.7473	12.4355	12.3929	12.3295	1.72758e-08	15.6153	15.7846	15.5273	15.5355	15.2872	15.5688	14.9621	15.6487	14.9487	14.8045	14.4033	13.1241	13.7755	13.8461	13.0627	1.14962e-05
Hmga2	15.5608	15.6706	15.286	15.5792	15.0404	14.8045	15.1587	15.4049	13.9506	13.7523	13.7514	14.3564	11.9981	12.1941	12.1665	2.18177e-08	15.4023	15.4597	15.5311	15.4481	15.2115	15.458	15.0439	15.2593	14.6666	14.7634	14.6324	13.1499	13.4906	13.317	13.0921	6.52555e-08
Dlk1	14.3142	14.6605	14.4652	14.3623	14.5289	14.4411	14.2997	13.9792	12.2238	11.8647	11.6201	11.2219	10.0983	10.8975	9.9653	4.3878e-08	14.5148	14.7355	14.319	14.3964	14.2297	13.4883	13.7872	13.6583	10.5961	10.0906	9.997	9.36564	9.9637	11.0169	9.68966	9.40399e-08
Dlk1	15.0173	15.0131	15.0516	14.4925	14.9289	14.6104	14.8057	14.6193	12.8614	12.9241	12.6667	12.8835	11.5717	12.2109	12.0399	4.3878e-08	14.7164	14.694	14.5741	14.6079	14.3463	14.5699	14.1274	14.0489	10.4115	10.8096	10.5121	10.8064	11.1522	11.4377	10.8799	1.18972e-09
Cox16	14.9602	14.7955	14.8361	14.6624	14.326	14.2413	14.2797	14.3099	13.6171	13.2609	12.7802	13.1915	11.8254	11.6505	11.6117	4.39223e-08	14.6779	14.8718	14.9285	14.7593	14.5527	14.2989	14.4037	14.6794	14.0784	13.856	13.7015	11.9761	12.5509	12.6355	12.3185	3.95954e-07
Col18a1	14.9953	14.829	14.9602	14.3477	14.7567	14.3187	14.9501	14.0782	12.7562	12.362	11.5841	12.1173	9.17083	9.99453	8.71472	5.16962e-08	13.8142	14.0251	13.8878	13.7379	14.3226	13.2457	12.5527	12.7841	10.1894	10.0098	9.3934	8.38912	7.28557	8.31496	9.05945	3.62821e-07
Cnn3	13.5758	13.4963	13.5117	13.1037	13.09	12.7104	12.544	12.3546	11.1763	11.3431	10.9011	10.6319	9.69767	9.2071	9.31964	5.65803e-08	13.7435	13.9658	13.6493	13.844	13.8654	13.5421	13.5344	13.9189	13.7047	13.5039	13.0831	12.0428	12.8296	12.4787	12.1495	0.000331869
Hbb-bt	15.8072	15.7264	15.9755	15.355	15.7888	16.0075	15.8854	15.2949	15.1977	15.3388	14.487	14.9534	11.8073	11.7143	12.3099	6.82237e-08	15.3974	15.0221	14.8822	14.6382	14.8915	14.9797	14.9404	15.191	14.5372	14.7319	14.2589	11.8194	12.2079	12.7589	11.8353	6.19434e-07
Ndrg1	9.44566	9.45526	9.58757	9.6044	9.97044	9.88091	10.8699	10.5364	10.1549	10.103	9.88971	10.5456	14.3656	13.7596	13.7983	9.0263e-08	10.2574	9.52561	9.66597	9.70729	11.0493	11.5214	10.1609	11.6591	10.7383	10.5637	10.8139	13.4593	13.607	13.5186	13.0731	2.51133e-06
Dnajc6	9.49424	10.0289	9.38671	9.82471	9.87655	9.85281	10.1909	10.1605	11.4779	11.422	10.8532	11.3644	13.3927	13.7169	13.1984	1.19853e-07	10.3583	11.6745	10.6525	11.6412	11.3344	11.9335	12.0523	12.6582	13.1039	13.0483	13.3806	14.3157	14.2908	14.3736	14.1195	1.69924e-05
H2-Q5	10.0264	11.1331	10.15	11.5857	13.4821	13.0403	13.231	13.1733	15.185	14.6921	14.9277	14.15	15.8157	16.1385	15.7276	2.17917e-07	10.9502	10.7921	11.2689	11.4957	11.1748	10.6239	11.1062	10.4312	13.341	13.3627	13.9663	15.7862	15.7477	15.6494	15.8475	2.01264e-09
Slc18a1	9.99015	9.25887	8.94482	8.55795	9.75255	9.82543	9.43046	9.82442	4.98657	4.7875	5.41265	4.65921	4.71118	4.65334	4.62179	3.9652e-07	11.7373	11.7484	10.7713	11.5341	12.4975	12.1506	11.3009	11.9512	12.0408	11.117	9.92567	10.6244	10.8787	10.9337	9.88563	0.152063
Hbb-b2	13.472	13.3082	13.5956	13.5667	13.2727	13.3852	13.1176	13.2203	12.6017	12.7609	12.9113	12.2959	9.97247	10.1336	10.8623	4.40739e-07	13.5194	13.5093	13.488	13.4345	12.6614	12.967	13.4682	13.0274	12.5461	13.1241	12.8331	10.0663	10.4536	11.2886	10.2296	2.48196e-06
Col18a1	11.7727	12.3598	12.6213	12.2909	11.8934	12.0124	12.1423	11.1986	10.396	10.2799	8.266	9.26324	4.69203	6.24186	4.59029	5.75426e-07	11.8128	11.8369	11.4705	11.3131	11.348	10.6352	10.3084	10.4976	4.59612	7.54736	4.55518	4.59058	4.54068	6.46934	4.63558	2.34249e-06
Col16a1	10.7888	10.4174	10.8784	10.3075	11.3616	11.5615	11.074	11.338	11.6613	12.3912	12.3011	12.6116	14.0444	14.0773	13.982	5.99048e-07	10.4121	9.85064	10.0007	10.265	10.4941	10.2154	10.492	10.5635	10.5811	10.9923	10.7402	12.4573	12.4117	12.1169	12.6679	3.18125e-06
Col16a1	7.49855	7.47147	7.71844	6.22695	9.35382	9.40195	9.31775	9.26774	9.9332	10.9454	10.2686	10.6449	12.3359	12.2669	12.1166	6.10604e-07	7.99993	6.74902	7.05269	7.41084	8.18566	6.89211	6.58406	6.87313	8.43402	8.34923	7.91105	10.1313	10.2047	10.0848	9.43961	0.000665363
Nwd1	11.3081	10.8006	11.2446	11.2784	13.0525	12.8915	12.6671	12.2212	13.5391	13.8423	13.5973	13.3595	13.9592	14.2338	14.0277	6.16815e-07	11.2158	10.7882	10.769	10.3561	11.8113	11.4505	11.7657	11.1876	12.5081	12.3422	12.4174	13.228	13.0525	13.1582	13.0003	4.46626e-06
Aldh1a1	9.43367	10.4022	10.1818	10.4357	9.77977	9.81907	10.0611	10.1242	10.7496	10.4099	10.9632	11.336	14.0958	13.6308	13.6559	6.21335e-07	10.1788	9.30667	10.8493	10.559	10.3895	10.2308	10.0824	10.0443	9.92299	10.2954	11.0042	10.6013	9.90888	10.123	10.8097	0.978088
Npdc1	8.54896	9.67167	9.54271	9.55715	10.2207	10.2213	10.6519	10.4259	10.5205	11.1918	10.9036	10.6831	13.4424	13.3437	13.2676	7.59783e-07	9.14584	9.79432	9.1694	7.46361	9.86153	8.9535	9.31069	8.942	9.25665	9.72317	8.01124	11.4086	11.3478	11.4697	11.4978	0.00354989
1810011H11Rik	5.41779	6.2352	5.25424	4.82089	7.37052	7.56435	7.58954	6.93832	9.70068	10.0344	8.35243	9.31547	12.0951	11.8374	11.2809	9.38957e-07	10.1696	8.90963	8.79595	8.61787	9.95802	8.90564	9.56475	9.49811	10.5822	9.82584	9.58638	11.8316	11.0687	11.331	10.6121	0.00698845
Lrrc32	11.287	11.3714	11.6556	10.4683	11.5152	11.3393	11.3575	10.3202	6.91943	7.9791	7.78978	8.48067	5.34977	6.35415	6.4318	1.10184e-06	9.85534	9.80381	9.42539	9.60124	9.85379	9.24194	8.18661	9.22887	8.38297	8.23179	7.2526	5.98278	4.66674	6.43375	5.71476	8.20738e-05
Cnn3	12.9177	12.8002	12.9201	12.4193	12.8128	12.0636	12.0844	12.048	10.9196	10.6832	10.1701	10.3279	9.02507	9.37328	9.80989	1.35654e-06	13.3572	13.6736	13.3546	13.5627	13.6937	13.1759	13.3182	13.3346	13.5283	13.4812	13.2285	11.8485	12.4095	12.2379	12.155	0.000102597
Bgn	9.68648	9.65952	9.78667	9.858	9.69077	9.6894	9.72879	9.7241	11.4103	11.9665	11.1129	10.5727	12.838	13.01	12.9999	1.35654e-06	8.9087	9.84833	9.68469	10.0627	10.1006	9.28004	9.52973	9.23069	9.66693	10.1456	10.5403	11.2085	10.7203	11.2938	10.5892	0.0190127
Lin28b	12.1501	12.2535	12.1208	11.4409	11.5485	11.2645	11.396	11.1298	10.575	10.5761	9.29274	10.3889	7.88343	7.28848	7.94562	1.58675e-06	11.7115	12.2392	11.7041	12.0126	12.0736	11.651	11.1034	11.9289	8.95127	8.31284	8.61125	4.99401	4.74112	7.11973	5.71841	3.37371e-07
Gem	12.8883	12.2486	12.5793	12.3011	12.8645	12.1201	12.9408	12.6823	11.9942	11.9891	11.2793	12.2899	9.4354	9.20626	9.08689	1.67222e-06	12.3503	12.439	11.8952	11.7934	12.1756	12.6831	11.1673	12.2704	12.4139	12.5793	12.5083	11.2941	10.9492	10.6131	10.0567	0.00764182
Tnfrsf25	13.44	13.1109	13.2037	12.8579	12.98	12.8634	13.0058	12.3647	11.9142	12.1373	11.3934	11.3697	9.82261	10.3655	10.1191	2.59026e-06	12.2251	11.9176	12.4825	11.9156	11.2404	10.0653	10.2382	10.4854	8.96121	9.47142	7.86212	7.83056	6.75522	8.44598	7.56296	6.5935e-06
Id1	11.8815	11.4298	11.7463	11.6347	11.9434	11.6952	11.5135	10.6455	10.9316	11.0442	10.4417	10.4733	7.57751	8.12018	8.34774	3.73713e-06	11.6064	12.0894	11.55	11.8421	12.4222	11.3878	11.4655	11.3128	9.94047	9.45905	9.03622	7.46884	4.53687	7.3713	6.12377	6.5935e-06
Cngb1	4.66581	4.69809	4.69008	5.06008	4.67154	6.34302	5.78668	8.47981	10.2868	10.7302	10.2812	10.8389	11.8518	11.4915	11.5043	4.04738e-06	4.74019	6.45832	4.64965	5.90312	9.80586	4.74371	4.69585	5.13159	7.22991	4.78148	7.98387	11.1726	10.7392	10.6151	9.76732	0.012369
She	12.4176	12.5964	12.1094	12.0465	12.3365	11.4178	11.2168	11.1642	9.86823	9.92962	9.35646	10.2937	8.99311	8.83407	8.7614	4.09689e-06	11.268	11.6492	11.9314	11.0562	10.7502	10.086	8.63558	10.8806	9.8946	9.04523	8.45129	8.98916	8.95162	9.14862	7.80439	0.00472984
Cxcr3	11.8894	11.9553	11.468	11.3862	11.2748	10.4575	12.1206	11.4738	9.80848	9.261	11.1508	9.04798	5.68817	4.91221	6.50203	4.17954e-06	13.0593	13.2432	12.38	12.7851	12.8843	12.9099	12.0415	12.1897	11.8875	11.8448	11.304	8.56723	8.19709	9.31908	8.74771	4.92389e-07
H2-Q2	12.9296	13.1452	13.1937	13.9563	14.829	14.62	15.3906	14.9883	15.1684	15.3951	15.5617	15.102	16.0621	16.4208	16.0858	4.17954e-06	13.8273	13.1245	13.0662	12.9587	13.508	14.8408	14.0915	14.7532	14.6146	14.8753	14.6547	15.8121	15.6037	15.9338	15.9646	4.82559e-05
Tuba8	10.1481	9.96078	9.98708	10.705	10.1295	9.38252	9.19602	10.2168	9.87385	9.96288	11.0192	10.4105	13.982	13.3708	13.7825	4.22938e-06	11.4954	12.6486	11.8983	12.2055	12.2268	10.8214	11.4222	11.7759	10.732	11.2046	11.1428	12.0686	12.4888	12.1941	12.055	0.076876
Pbld1	4.55138	5.17888	4.53984	6.05561	6.9947	7.39117	7.70996	7.58012	8.99284	9.7731	9.27476	9.81405	9.86853	9.8338	9.72026	4.44521e-06	4.5936	4.74706	4.56724	4.84043	8.314	5.02143	4.6338	4.73732	6.02207	4.65629	7.15599	8.68657	8.11248	4.66012	8.23101	0.293241
Rasip1	13.5214	13.6952	13.3852	13.9124	12.7981	12.917	12.6695	12.6774	11.2933	11.3289	10.2377	10.5845	9.701	10.838	9.44743	4.48605e-06	12.8785	12.3052	13.0945	12.4028	9.93047	10.0539	10.0053	10.5963	9.48343	9.0937	9.63403	9.15195	8.53197	9.38931	8.2585	1.18976e-06
Egr1	9.43168	8.91162	9.27639	9.8355	11.7909	11.7659	11.1928	12.2317	12.1497	13.0098	13.8367	13.1029	13.6952	12.8417	13.622	5.23416e-06	10.1168	9.87279	8.68267	9.08939	10.661	11.2545	10.1303	11.8629	10.071	9.15131	10.4889	11.3981	10.5374	9.45923	9.65757	0.21454
Plagl1	15.0889	14.6193	14.8429	14.4252	15.3817	14.3532	14.7798	15.5956	13.0156	12.5764	12.9379	13.2068	11.3296	11.7995	12.3698	6.44453e-06	12.5065	12.6085	14.3653	12.8602	12.5166	12.0228	11.3317	12.743	12.0484	10.4867	10.9606	10.2317	7.18357	11.0629	10.3785	0.0239342
Slit2	12.6576	12.6673	12.5059	12.4417	10.6106	10.4949	11.1553	10.7959	10.1602	10.6652	10.5106	11.0567	9.71293	9.93944	9.31246	6.93749e-06	10.2275	10.6825	11.2645	10.4276	9.91647	9.04556	8.76753	9.9909	9.01015	8.62206	8.87654	8.19091	6.97361	9.28871	9.51578	0.0349699
Rasgrp3	9.74122	10.2517	10.1132	9.00018	8.91477	8.88015	8.8162	9.07116	7.96872	6.77428	6.34975	6.21023	4.57288	4.51943	4.49823	7.15746e-06	9.1334	8.6709	8.4286	8.35095	9.17634	8.74887	8.4045	9.20095	7.02109	7.63599	7.44982	5.59544	4.577	6.72916	6.04313	0.000686889
H2-K1	13.2792	13.1363	13.0853	13.5761	14.3736	14.1899	15.1533	14.8498	14.931	15.1874	15.2313	16.0833	17.0019	16.4954	16.3105	7.30407e-06	13.2798	12.7165	12.4718	12.5069	13.9444	14.4881	13.5413	14.7738	14.4044	14.6308	14.2891	15.5115	15.2628	15.4818	15.4202	1.44798e-05
Grap	13.9604	13.9281	13.9112	13.824	13.3582	12.7666	12.6636	13.1602	10.9298	9.48882	11.9886	9.44678	7.72401	8.92615	8.73345	7.75082e-06	13.5445	13.5157	13.6343	13.5143	13.6426	13.3412	12.7157	13.1394	11.7514	12.2201	11.2735	10.3629	10.4451	10.4607	8.60697	1.69924e-05
Igf2bp2	13.4306	13.4507	13.4137	12.956	13.8135	13.5238	13.4736	12.6989	12.8981	12.5709	11.8598	11.9994	10.0798	10.3749	9.38291	9.11359e-06	12.747	13.0558	12.7289	13.1037	12.5136	12.1367	12.5114	12.1969	10.1536	10.6536	9.70368	4.59396	7.07671	7.77501	8.06133	5.21117e-06
Cd53	12.536	12.6342	12.5513	12.6406	11.6239	12.2137	13.3351	12.6299	12.5018	12.8501	12.7613	12.6005	9.15161	9.85989	9.13077	9.60918e-06	13.3994	12.861	11.9769	12.5076	13.1717	14.4155	13.256	14.0467	13.4107	13.4574	13.3518	14.3964	14.2787	14.2721	13.5321	0.0391541
Rgs1	6.04525	4.74105	8.11469	5.94619	8.30247	8.96389	8.06625	8.09288	12.3438	12.2589	11.3566	10.9732	12.5406	11.59	12.2261	1.03636e-05	10.1295	7.83977	6.52936	4.69062	10.1908	10.4623	11.1641	10.9865	11.0507	9.54461	11.1269	11.2144	11.1951	10.7341	10.6042	0.01842
Pxdn	9.9037	10.3027	10.5348	9.67804	9.02938	8.92645	8.43915	8.55977	6.53871	7.19967	4.54979	6.26643	4.60951	4.58467	4.54632	1.39975e-05	7.35047	7.11506	7.70661	4.65277	4.62537	4.47916	4.57338	4.6099	4.65311	4.58599	4.88851	4.51531	4.64137	4.57984	4.5488	0.0508808
Sox18	13.027	13.2935	12.8687	12.7131	12.6991	12.3856	12.6954	11.7626	10.7818	10.7341	9.14934	9.65402	8.53043	9.71346	9.14497	1.58402e-05	11.9628	12.4995	11.9445	12.1483	10.5009	10.3972	10.9554	10.2042	8.99671	8.30784	7.90052	6.51941	7.59049	7.79083	8.4055	1.63643e-06
Sparc	9.87861	9.39506	9.55776	9.34184	9.71548	9.95499	9.81754	8.44379	6.73962	5.30223	6.80304	4.78935	4.63156	4.6855	4.78594	1.70727e-05	7.53914	6.95008	6.77045	5.06994	6.7597	7.40659	6.37689	7.52049	5.58836	5.221	4.64726	5.62242	5.12278	5.28614	4.92082	0.0806824
Plagl1	13.8503	13.3262	13.594	13.4254	14.0854	13.0293	13.4909	14.6006	11.8932	11.4353	12.0664	12.0818	10.0475	10.6481	10.9873	1.78539e-05	11.3802	11.6726	13.094	11.9489	11.7021	11.0059	10.0547	11.4509	10.7555	9.73877	8.3901	8.79648	6.70521	9.90511	8.75801	0.00808369
Igf2bp1	10.9524	11.309	11.2474	10.885	9.64821	10.1326	9.12021	9.54773	7.99847	5.85964	5.29851	5.34514	4.70567	4.78802	6.54366	1.82404e-05	11.11	11.8563	11.6422	11.5761	8.45994	8.42287	9.04353	8.64971	7.93856	7.89315	4.69857	5.39066	7.86008	7.61113	5.21034	0.000647746
Bank1	13.4838	13.0302	12.9121	12.493	13.0882	13.3417	12.9446	12.861	12.1023	12.3364	13.174	13.1808	10.0332	10.3821	9.51157	1.86893e-05	12.5247	12.5774	12.4792	12.4611	12.2671	11.9974	11.737	11.6728	11.9573	11.8143	11.6019	10.1579	10.4909	10.3625	10.0841	2.38334e-06
Cpne2	10.2341	9.76363	9.17139	9.74843	10.4862	10.0463	10.3493	10.3416	12.1314	12.1636	11.0418	11.7445	12.6171	12.4585	12.7651	1.94235e-05	9.7811	9.66174	9.44856	9.64794	9.7304	9.60552	8.91385	9.75675	10.5449	10.6569	10.0617	12.4144	12.237	12.0012	12.1043	2.0945e-06
Gbp4	4.97493	4.50014	5.03625	4.5164	8.99671	7.63647	8.7479	9.63911	9.48439	8.10898	8.52248	8.96242	9.10069	9.91549	9.26816	1.98619e-05	4.50634	4.52674	4.4997	4.57017	4.51421	4.49667	4.51255	5.43196	4.57244	6.46161	4.65959	4.48333	4.57897	6.23974	4.54054	0.874308
Tmem151b	10.488	9.96555	10.574	9.61154	10.0206	9.65908	9.43987	7.69907	7.1369	8.22975	7.65188	7.80087	4.6973	4.69164	5.0551	2.03865e-05	9.92607	10.3776	9.52352	9.27177	11.2072	9.86657	9.84593	10.583	9.59427	8.63159	9.22019	9.24606	8.52883	9.1038	7.35412	0.0559597
Rbp2	11.4805	11.52	11.7863	11.0451	8.98547	10.7168	10.913	9.66872	9.22918	9.16244	8.10367	8.70241	6.66914	7.24597	6.83683	2.47076e-05	11.0726	10.3448	9.65707	10.0902	9.58757	9.48064	8.34976	8.30471	8.18116	7.8785	7.39035	6.08469	4.54969	8.49517	8.32838	0.0252798
Wfdc17	12.096	11.4092	11.9194	12.9905	11.1647	11.2736	12.0003	12.3754	9.70004	9.78784	10.0211	9.49824	8.89977	8.92269	8.41121	2.47076e-05	13.2361	12.6031	11.7052	11.9756	13.2618	13.3211	12.5321	13.1606	12.0425	12.1166	12.268	14.215	14.0771	14.2214	13.8577	0.00095783
Pvrl4	6.37847	8.28956	7.47424	7.36204	10.1318	10.0469	10.6424	10.3236	9.97168	10.4222	10.0812	10.6832	11.3075	10.8616	10.5687	2.70144e-05	7.02548	4.8919	5.17219	4.71506	7.02834	9.06964	5.87695	10.0392	9.26364	6.41948	7.27431	9.44063	9.91784	9.87039	8.98262	0.031746
AK087605	10.6527	10.4354	11.2779	10.7163	13.2813	12.0503	12.4191	13.2976	12.9454	13.2052	13.2343	12.6404	13.6027	14.0036	13.7424	2.97744e-05	10.7402	10.917	10.7302	10.2246	10.4831	11.1704	10.4485	10.841	10.9709	11.2727	10.6914	12.8406	12.6441	12.3247	12.5505	5.17522e-05
Crispld2	13.4065	13.5037	13.0639	13.5303	12.1224	12.3073	12.2915	12.5298	11.3796	11.7891	11.9772	12.4304	10.0543	11.0492	9.72853	3.62119e-05	13.9649	13.7114	13.3425	13.4275	13.9049	13.6536	12.7221	13.0831	12.489	12.1973	12.2111	12.2572	11.529	11.6543	11.5485	0.000320022
C1ra	9.95459	9.85464	10.3475	8.78106	11.5315	11.2833	11.5572	11.3142	12.1262	12.5563	11.6995	12.7168	12.8731	12.7324	12.638	3.90368e-05	9.3205	8.48914	8.2667	8.46103	10.6201	9.76704	8.93131	10.7878	10.7353	9.82842	9.90845	11.1673	11.6446	11.5108	10.9393	0.00180234
Chil5	14.2634	13.8265	13.9294	13.3949	13.6351	13.6259	13.8108	12.9635	12.5649	13.1423	11.9539	13.056	11.1241	10.9158	10.1184	4.28381e-05	12.3839	11.907	12.1803	11.4879	12.0626	11.5963	10.4674	11.4255	10.6514	9.66665	10.0238	8.74433	8.14755	9.99542	8.37292	0.000304973
Fn1	13.3348	13.6169	13.1084	12.6244	11.5111	9.91619	9.70944	9.45046	8.7991	9.16698	5.78475	8.50163	7.19883	6.11057	4.96933	4.43922e-05	10.7019	11.2225	11.942	10.8676	9.09588	8.12072	7.34064	9.14358	8.11762	8.07265	6.313	4.91276	5.87695	6.11137	4.69217	2.29413e-05
Spns3	8.04599	9.31022	8.72445	8.47307	9.07477	8.90758	9.40434	9.76818	11.6581	10.7257	10.4144	10.3867	12.1714	11.6905	11.9032	4.85779e-05	11.8663	12.3023	11.0967	12.1982	13.489	12.6782	13.1796	12.5146	13.8791	13.6756	13.6182	14.1987	14.3614	14.0977	13.8872	0.000111226
Atg9b	13.8232	13.3751	13.1547	12.6104	12.1594	12.3802	12.3487	10.9057	11.4436	11.2483	10.2344	10.3166	9.6311	9.23213	9.10204	5.0038e-05	10.6455	10.6286	12.5509	10.3659	10.6701	10.1079	9.47966	9.91279	10.9399	8.62969	10.4501	10.6083	10.9332	10.0173	9.68685	0.549386
Tceal3	5.29611	6.91498	6.01968	7.51317	8.69372	8.18384	8.75186	8.81685	9.63045	9.95293	9.42113	9.31478	10.411	10.598	10.7043	5.02953e-05	5.14832	6.47212	6.29401	6.08187	6.17491	4.85684	5.24275	6.6807	6.18376	5.27432	6.45298	7.62464	6.00708	8.03019	8.02739	0.23419
Nos3	11.3632	10.8881	10.2919	10.9497	9.52456	9.74427	9.78856	9.44535	8.67734	8.80133	7.44244	8.13861	6.57154	6.301	7.93605	6.36972e-05	8.98125	8.3659	10.8698	8.72445	8.47438	8.52948	7.67401	7.07913	9.05231	7.29783	8.22995	8.58636	8.88389	7.08865	8.73534	0.4984
Gbp11	5.00299	4.86676	6.50556	4.73197	8.46683	8.43346	8.15391	8.75123	8.29003	8.20817	8.17288	9.2906	9.45184	9.31042	9.49811	6.46364e-05	5.9022	5.73877	5.77357	5.63213	8.18307	7.36295	7.12302	6.86222	7.7251	7.59333	5.50458	7.21916	7.61995	7.71735	7.20979	0.134125
Tspan8	9.40362	8.99421	9.30856	8.81929	8.08432	7.61598	8.47798	7.75088	7.32078	7.13811	5.37952	6.83548	4.58376	4.53193	4.49491	7.59e-05	8.26994	8.47716	7.69865	6.39401	7.49398	4.48376	4.49167	6.48553	4.58795	4.51036	4.67044	4.47078	4.59114	4.50483	4.50957	0.0161058
Serpinb1a	9.32232	8.69292	8.27027	9.33496	9.2524	9.13633	9.74594	10.0197	11.5488	10.9274	10.1828	10.6684	12.64	11.8089	12.1012	8.25398e-05	12.8087	12.6951	11.7781	12.2906	13.7897	13.8148	13.0084	13.3999	13.5432	13.2028	13.0358	13.7091	13.9551	13.9065	13.4864	0.00602196
Fbp1	6.31061	7.0892	7.2122	7.5888	10.1231	8.34364	10.5654	9.81828	10.409	9.81893	9.68707	10.2612	11.2995	10.8039	11.1986	8.57999e-05	7.83244	9.10583	8.89031	9.13733	11.7238	10.8813	8.81221	9.88538	10.0885	10.9674	10.3715	11.7068	11.783	11.6442	11.3642	0.00722302
Cdh5	8.5676	8.39526	7.92937	8.56409	7.90929	7.1905	7.64732	7.55824	5.95455	5.7412	4.69385	4.85272	4.72134	4.83239	4.93426	8.57999e-05	7.02648	7.02834	6.12733	5.57139	5.59218	6.32944	5.843	6.21177	7.74875	5.41607	4.60998	6.29793	5.41578	6.06206	5.77445	0.94044
Ltbp3	12.6727	12.905	12.5085	14.1612	13.8683	13.776	14.1496	14.5499	14.9165	15.1394	15.2683	14.9399	15.7862	16.0746	15.6998	8.74453e-05	13.2895	13.0421	13.9497	14.2348	13.3472	13.6198	14.0629	13.5737	14.2638	14.4194	15.0506	15.8275	15.7075	15.764	15.8305	4.82559e-05
Esr1	5.31473	4.59484	4.67568	4.6332	7.54542	7.54106	7.07142	5.15587	10.3049	10.3917	8.65328	8.94382	9.47901	9.87238	9.23388	8.9003e-05	4.63249	4.80237	4.60998	4.77203	6.72408	5.93979	7.6316	5.42753	10.691	10.8645	9.51221	11.7177	11.8297	11.1878	10.8759	4.92389e-07
Tnfsf12Tnfsf13	9.44164	9.31083	8.42453	8.44652	9.42007	8.79663	9.27446	8.94887	10.6349	10.4637	9.72554	10.0411	12.1771	12.0974	11.3155	9.11959e-05	7.39478	8.33066	7.45664	8.33209	9.53141	8.38182	8.18831	8.93351	7.58672	9.17967	7.73257	9.8907	10.2096	10.892	10.4549	0.00423276
Cdkn2c	7.82524	6.13778	4.72505	4.47612	4.49812	4.59146	4.49047	4.49152	9.13064	9.01748	8.03162	9.42113	10.4492	9.79246	9.91968	9.23686e-05	4.46895	4.49739	4.46557	4.57423	7.30449	5.25356	7.63547	4.51163	9.86328	8.32994	8.56051	10.6972	10.8212	10.8873	10.3686	2.435e-05
Gda	8.99502	7.72097	8.3379	8.10748	9.48856	8.34455	9.67276	9.60271	10.1439	10.9726	9.78597	10.3761	11.8923	12.279	11.5193	9.23686e-05	8.15426	8.08147	8.52324	8.22221	8.61171	8.86827	7.7629	8.66078	8.96544	8.9653	8.97463	9.36754	9.05059	8.96406	9.31547	0.136501
Sox6	4.67434	6.27951	5.73591	7.08169	5.00654	7.80248	4.68986	4.80116	10.2362	10.172	9.03873	9.60026	11.2455	10.9184	10.9748	9.64498e-05	4.86453	5.06778	8.39704	4.67568	4.65248	4.66615	5.10724	4.6827	4.70927	4.73074	4.64467	8.45479	7.36825	8.49462	7.27704	0.0230104
F830016B08Rik	8.07552	6.87917	9.75558	8.50131	11.9783	12.4443	11.9784	11.5654	12.1997	12.0608	10.88	12.0028	12.3419	12.1858	11.9726	9.67171e-05	8.24384	4.91247	9.06722	9.26653	9.74857	9.28533	8.21557	8.01593	7.98442	5.67766	5.56342	10.037	10.2725	9.8379	9.95361	0.066899
Alcam	8.06277	7.53914	6.30492	7.44409	9.64218	7.58356	9.80834	9.6377	11.397	11.4472	10.3189	11.3166	11.7901	11.7392	11.3072	9.81251e-05	6.62457	7.83718	5.27333	5.32203	9.69672	9.29287	8.60135	8.71345	10.4724	9.08739	9.82968	11.8123	12.0126	11.8083	11.0903	2.435e-05
Tenm4	13.4684	13.3361	13.1919	12.722	11.8391	12.4028	11.6979	10.4529	11.7275	11.7352	10.9143	10.2984	9.4993	9.10255	9.02005	0.000102444	11.3647	11.966	12.286	11.4463	10.8407	9.9565	9.80394	9.41934	8.89076	9.38034	8.98534	7.80327	7.7061	7.87416	6.04828	1.89629e-05
Ltbp3	7.60959	8.03843	9.05531	6.17935	10.8269	9.89301	10.3681	10.1146	11.3601	12.107	10.8672	10.9222	11.9662	12.1481	11.8881	0.000109373	7.99628	7.71061	5.20365	6.52191	9.02989	8.14129	7.42662	8.16788	10.0606	9.4727	9.62884	11.8163	11.6961	12.0448	11.3341	4.92061e-05
Cdk3-ps	10.4395	10.6379	11.0848	10.8815	11.4616	10.6841	10.8913	11.0853	9.92893	9.41134	8.95383	8.43186	7.05169	8.51864	7.99026	0.000109373	9.33945	8.65459	9.45565	9.1093	7.98082	7.66272	7.98725	8.58498	7.38431	7.98224	5.15733	5.91934	7.86601	8.76338	7.68999	0.155007
Lin28b	10.8112	10.9795	11.1049	10.5373	11.0872	10.9797	10.2559	10.0563	9.38003	9.75868	9.12838	8.64502	4.57892	7.27321	7.08392	0.000110221	11.2567	11.76	11.0916	11.3805	10.3854	9.78295	10.5017	10.6134	9.05608	8.52798	8.01101	5.75909	4.86831	7.14807	5.01131	1.63643e-06
9030617O03Rik	12.4574	12.2194	12.2774	11.224	12.1034	12.0959	11.605	10.7319	11.2819	10.9622	9.87454	10.9123	8.58602	8.57981	8.58204	0.000111598	11.7005	11.2736	10.8373	10.849	12.1816	11.4652	12.0364	11.4502	11.3913	11.4634	11.2039	11.3407	11.2697	11.1178	10.1083	0.286398
Ctss	7.77923	6.34338	7.97496	8.66915	10.5131	9.92865	11.2229	10.9525	11.5832	11.8092	13.8081	12.5031	11.2135	10.4883	11.193	0.000114638	10.4503	10.0528	9.91189	10.9294	12.4276	12.8168	12.4829	12.5197	12.4069	12.7781	11.993	12.7071	12.2549	12.526	12.1683	2.29356e-05
P2ry6	9.87523	9.52034	9.45605	8.83225	9.14125	8.92446	8.9345	7.88638	7.93212	7.60663	7.67962	7.03215	5.72812	6.08869	5.75993	0.000122105	8.64	9.33467	9.69823	8.0449	8.89135	8.22456	9.65131	7.32048	8.30768	7.90842	6.97971	7.93086	7.65944	8.08607	6.71392	0.321684
Hbb-b1	10.4275	10.241	10.475	10.8615	10.7524	10.4659	10.5303	10.1487	9.91563	9.28813	10.9507	8.646	6.83606	6.55631	7.46409	0.00012348	11.4818	10.992	10.6722	11.14	9.87359	9.63621	11.1231	10.0435	9.86853	10.5337	10.1923	6.83577	7.57778	5.83406	7.72775	2.55605e-05
Clec4e	11.5333	11.2358	11.261	11.1325	10.0944	10.3318	11.3743	10.0791	10.0299	10.0087	8.10862	9.54939	5.95765	7.62486	7.25323	0.000126995	10.5566	11.3554	10.5528	10.6192	11.7541	11.258	11.0256	11.1904	11.1473	10.9821	10.1779	10.5241	10.826	10.7023	9.61395	0.294914
Peg3os	11.8116	11.5727	11.9808	11.0356	11.7192	11.512	11.1114	10.4647	10.7438	10.737	9.53943	9.27832	8.03103	8.14053	8.48033	0.000146221	10.8802	11.0946	11.5146	10.8038	10.1333	9.12737	9.88244	9.38745	6.7993	8.13532	6.97114	6.20773	6.329	7.58857	6.50203	4.12158e-06
Tenm4	11.9592	12.0887	11.7704	11.4374	10.6208	10.6301	10.0347	9.89725	9.82629	10.0924	9.68513	11.0245	9.08432	9.00069	8.8715	0.000148115	10.4712	10.932	10.54	9.92698	8.5104	8.35766	8.37257	8.73715	9.17865	7.87524	7.34835	4.96117	5.59664	6.86153	6.46896	7.05165e-05
Apoc1	12.5255	12.6182	12.4392	13.2658	11.8242	11.4971	11.127	11.5723	10.9383	9.65564	11.502	9.90729	9.2575	9.76985	9.35711	0.000160412	12.779	13.6245	13.0952	12.9964	12.8063	11.9221	13.0802	12.4615	11.4956	10.8882	11.0444	9.7027	9.42495	9.80748	10.2289	2.06809e-06
Mdfic	8.07514	8.09185	6.06812	8.0154	9.82657	9.5463	9.36725	9.99911	10.2044	10.5657	9.86153	11.1894	11.5886	11.1608	11.2267	0.000173566	8.46132	7.70426	8.16677	7.86646	10.225	9.07365	8.84779	9.6521	10.1636	9.95802	9.05365	10.9667	11.1026	10.514	9.75416	0.00221934
Pirb	9.45778	9.25734	9.32105	8.11926	9.3863	9.471	10.0282	9.06904	9.8907	9.83136	10.9908	8.70194	6.35492	5.66404	5.38213	0.000179369	10.3376	10.3485	9.69619	9.99528	11.6705	10.3922	10.5121	8.663	10.8516	10.8239	10.149	9.88034	9.65038	9.87995	9.85267	0.728339
Peg3	10.099	10.6216	9.94378	10.7099	10.8377	10.6445	10.586	9.47545	9.4988	8.39094	7.31657	6.74817	5.46595	6.82943	4.9212	0.000180347	10.6997	10.2904	10.7927	10.2228	8.11779	8.13639	7.74153	8.6199	7.38174	4.64025	4.63767	4.64025	4.58828	4.61471	4.67626	9.80115e-06
Cebpd	10.657	10.0091	10.7025	9.99514	9.77884	9.87984	10.2996	10.1301	9.33976	9.64596	8.61271	8.40186	7.77265	6.21023	5.46125	0.000185322	10.7507	10.8825	9.63982	10.0377	10.8053	10.5871	10.4509	10.8089	7.16623	9.68439	9.28743	8.98502	9.59985	9.16066	9.12721	0.0340281
Ldb2	12.1803	12.1581	11.5616	11.093	11.6636	11.2398	11.7654	10.4697	9.25808	10.8676	9.23461	9.46675	8.43863	8.53489	8.47348	0.000201536	9.89816	10.3024	10.8144	9.52561	8.36652	7.8608	8.51018	8.59091	6.92098	5.06403	5.73296	4.74259	5.59544	4.8919	4.80063	7.38094e-06
Bcl6	9.39914	8.81021	8.11214	8.59698	9.05654	8.35989	9.25605	9.32717	11.0789	10.7571	11.7283	9.963	11.2906	11.7055	11.7916	0.000208132	9.60522	10.1384	9.56851	9.84415	11.8025	11.2474	11.3023	11.5021	11.7699	10.8172	10.3283	12.8839	12.7283	12.0583	11.5829	0.000530674
Gpr65	8.31223	7.14056	6.46736	8.38664	10.8188	10.3543	10.115	10.7586	10.0825	10.0999	9.62375	10.3116	10.3526	10.8056	10.2115	0.000217761	11.3556	11.0157	9.70807	10.1102	11.6689	12.0636	11.6628	12.3974	11.0751	10.6046	10.3724	12.1395	11.4662	11.6156	10.5704	0.0736715
Postn	10.6235	10.9915	10.6655	9.46099	9.24301	10.1083	9.06933	8.8707	8.30417	9.25033	7.2212	8.4924	4.61791	6.35015	6.31806	0.000233047	10.4698	11.2921	9.77149	10.0591	8.33551	8.54205	8.45802	8.7044	10.8471	10.097	10.1178	8.66415	9.29572	9.12173	7.68587	0.00370391
Rara	11.1807	10.7634	10.9785	9.74122	12.3017	11.1657	11.4421	10.7389	11.432	11.5906	10.3702	9.91423	7.79934	7.33216	7.92232	0.000279942	9.30562	10.5724	10.3721	9.91715	11.6981	9.91279	10.0474	10.2726	10.5592	10.4104	10.5007	9.99	9.41638	9.34531	8.98483	0.237847
Mpo	10.5487	11.3424	11.0726	11.4567	9.409	8.9205	8.66945	10.8546	8.65459	8.24558	8.02806	7.69639	7.78633	6.65569	7.80756	0.000299229	14.1997	14.9399	14.0285	14.4311	14.5107	14.3344	15.1414	14.5802	13.8362	13.9091	13.7174	14.1264	14.6469	14.0525	14.5694	0.155303
Slmo1	5.22181	5.59347	7.16252	5.95814	7.44771	8.53013	7.84085	7.67835	9.52672	9.08549	8.91625	9.21885	9.57593	8.89709	9.08505	0.000319612	5.02507	5.47971	5.51804	6.67332	8.27642	5.13225	5.58624	7.23943	8.43843	6.7923	5.35756	6.24226	5.31805	4.83197	5.83406	0.637513
Abcb1b	8.72329	7.6894	8.06954	5.94899	9.41514	9.87494	8.36236	10.0651	11.0146	10.382	9.72686	10.769	12.1583	11.9788	12.1714	0.000327156	9.9917	9.56217	8.62365	8.14824	11.3912	11.1538	10.8976	11.67	11.9613	11.5512	11.5912	12.7466	12.6246	12.638	12.0553	2.9348e-05
Sparc	13.174	12.6782	12.3325	13.2524	12.964	12.8642	12.8154	12.3017	10.9387	9.38132	11.2969	9.76555	8.53456	7.12396	10.2792	0.00033132	11.7222	12.3798	11.8408	11.9044	12.5822	11.8157	11.6738	12.181	10.4535	10.7326	9.20571	10.5902	10.4265	9.13038	9.95344	0.00113989
Serpinb1c	4.47643	4.48688	4.4709	4.46872	4.51059	4.55098	4.4698	7.54224	7.94159	8.38002	7.34967	8.14109	8.82417	9.23085	9.7208	0.000331322	10.3832	10.4607	9.29619	9.9934	10.9684	11.4589	10.9165	11.1022	10.9907	10.857	10.1189	11.6351	11.4402	11.4279	11.3072	0.011809
Rusc2	9.38898	6.86951	8.57624	7.48174	11.042	9.81661	10.2622	10.021	10.4296	10.4983	10.3402	10.336	11.7088	11.8213	11.9675	0.000368444	7.72047	4.50493	8.12591	7.72662	9.69367	7.52299	8.25313	7.0406	8.04811	6.98552	8.47307	10.7472	10.3118	10.3628	9.13418	0.0661271
Bpifb5	8.00064	8.93073	7.33809	8.25953	9.05145	8.47255	10.1002	9.88945	10.2338	10.9991	11.0334	10.4855	12.3109	10.819	12.2493	0.000374785	4.61173	4.64991	4.58413	4.63308	4.59365	6.98065	4.63719	4.62677	4.64267	4.63173	4.82931	10.99	10.3918	9.63911	9.43114	1.39364e-05
Nckap1	7.63083	5.85768	5.57733	7.62151	9.4604	8.89926	9.96275	10.4214	10.0659	10.2763	8.94887	10.455	10.5937	10.82	10.449	0.000405602	7.34993	7.05766	6.34059	4.56092	8.62444	8.95969	6.1542	7.77416	8.29848	8.3679	4.65752	8.29627	7.89216	6.88435	6.30705	0.71586
Dst	5.70326	5.26641	5.59465	7.01985	8.96228	7.214	8.5638	9.1578	9.006	9.27363	9.23098	9.96396	9.20202	9.13956	9.79767	0.000407089	4.59602	4.65578	4.58919	4.72081	4.68959	5.83534	4.60196	5.33927	4.69305	4.66504	7.93692	8.40169	7.21509	8.26068	7.69461	0.0158843
Megf6	10.2246	9.55095	9.84675	8.98591	8.93368	8.48386	9.02938	8.57053	6.71277	7.31936	5.39344	6.25376	6.67541	5.79266	7.31182	0.000429647	7.55456	8.9788	8.8056	7.95815	7.04299	7.58478	7.77817	6.96529	8.09128	7.60773	6.87036	7.94472	7.30179	6.52732	6.11015	0.340905
6720473M08Rik	5.04308	5.26531	5.62199	6.80809	8.43525	7.81026	8.67894	8.27492	10.3625	10.0851	8.34733	8.98611	9.00426	9.37432	8.59075	0.000438668	7.4356	7.85651	6.31969	7.003	8.53197	7.55456	7.34086	7.2305	8.93057	7.81252	8.28219	9.56838	9.98028	9.37493	8.42475	0.0269123
Prom1	12.0683	11.8445	11.0754	12.0982	9.47459	10.3301	8.95577	10.2622	8.80013	6.3842	8.32916	8.3848	9.14821	8.00743	8.99206	0.000463654	10.8114	11.5459	11.6293	11.3422	9.87753	9.26209	10.651	10.4769	9.37901	7.65839	8.69987	8.33826	8.50163	7.99381	9.32277	0.000584056
Sema7a	4.74534	4.67125	4.64614	4.85786	6.26335	4.60578	4.97042	5.06952	5.02252	7.62942	7.03644	5.62557	8.97962	9.55196	9.34476	0.000497088	5.12168	5.59733	4.78612	4.73339	4.76605	4.75112	5.49243	4.7443	5.00444	4.85973	4.58169	5.07065	4.65841	4.7903	4.82689	0.987323
Ptprb	9.87263	9.53349	9.5828	8.9611	8.79014	8.51991	9.31433	8.9763	6.8755	6.22567	7.24573	9.15808	5.32791	5.68275	4.89852	0.00049771	4.60499	4.56597	7.81794	4.50624	9.71141	4.58955	4.61352	4.53039	4.54802	7.25146	4.47856	4.57784	4.49047	4.52674	8.07048	0.999999
Hif1a	7.6174	7.85343	9.21455	8.52764	8.1317	8.74595	8.78886	9.60679	8.57896	8.69973	8.11076	8.05444	5.4842	4.61149	5.64715	0.00050756	5.9724	8.61527	8.46292	7.4541	9.09251	8.50299	5.05238	7.29211	8.80782	7.27044	7.51999	7.3672	7.96124	5.96297	4.75091	0.787258
Insm1	9.28898	9.03005	9.06876	8.58952	9.19036	8.18442	7.91147	6.64981	4.57023	4.59079	4.55179	6.36613	5.31304	5.99209	4.60264	0.000538228	6.20558	4.65943	4.61538	4.59167	9.5216	4.61264	4.68448	8.12376	4.61283	7.14267	4.5811	4.60708	6.45257	4.58523	6.60923	0.722841
Tnfsf13os	7.30449	8.21961	8.49684	8.38389	9.56542	9.17306	8.81898	8.61885	10.6204	9.90632	8.97002	9.33907	11.1129	11.1017	11.2837	0.000549668	7.6526	8.13821	7.88909	8.34316	9.29315	8.42897	8.15121	8.40902	7.74238	8.51776	8.3853	10.4272	10.3493	10.3852	10.0442	0.000356672
Cysltr2	9.84193	8.90564	8.92709	7.56296	11.3558	9.93871	10.6012	10.4569	11.3119	10.7654	10.8996	10.9029	11.8467	12.1022	11.9316	0.000670591	7.20836	4.64186	7.08392	4.5138	9.02859	8.01101	8.41309	8.99824	10.6058	9.40785	10.1444	11.0185	10.6642	11.5536	11.1598	7.61185e-05
Perp	6.51269	6.27373	6.58208	7.61899	7.51077	7.10115	7.14866	8.2961	8.80594	9.40448	7.62151	9.45184	10.4558	10.0052	10.4139	0.000727032	6.48263	5.05905	8.40726	6.75335	8.36151	8.68688	8.02497	9.52927	5.0394	7.05646	5.87998	7.25489	7.70907	7.70328	8.04935	0.0757361
1700016F12Rik	9.06817	8.01632	9.02038	9.95163	10.2521	10.102	10.3116	9.41699	9.87564	8.99001	7.80615	9.06964	4.50836	4.57705	6.99343	0.000747004	4.71294	8.14298	6.88048	4.59602	7.13431	6.78659	7.09776	7.61524	4.64604	4.60573	4.52952	4.67794	4.55582	4.60862	6.23674	0.118066
Klf9	6.43935	7.49879	6.36209	7.27156	11.1356	8.2877	10.1518	11.4785	9.71224	10.3082	9.9565	10.2075	10.2868	10.7752	10.7305	0.000750155	4.56417	4.89426	4.54415	6.44683	6.62268	7.95371	4.60065	7.80268	4.96057	4.62065	5.10821	9.83951	8.91088	8.75073	8.63729	0.00320825
Nid1	10.7428	10.5165	11.3065	11.3156	11.6719	10.0858	11.0944	10.521	10.5644	10.1967	9.82998	8.41374	6.07165	7.6951	7.93382	0.00078881	9.38484	9.96782	11.1971	10.664	8.49501	7.65355	7.0163	8.90758	7.94583	8.66589	9.63956	9.2903	7.5601	7.8235	7.04869	0.037034
Tcte1	8.79558	8.24866	9.12798	8.69614	9.17553	7.69024	7.06938	6.73997	5.26334	6.22899	5.56075	6.86298	4.67806	4.68055	4.58201	0.000844876	9.38003	8.84992	8.83129	8.10485	10.2337	9.02763	8.67318	9.45833	8.4756	7.5604	8.09273	8.57457	6.67267	8.21978	4.95206	0.139358
Rai2	4.97115	4.87431	6.67363	4.87068	4.62899	6.65718	7.25758	4.75295	9.10423	9.39987	8.04051	8.45617	9.72013	9.77075	9.11739	0.000862055	7.70473	6.19215	5.93601	8.12056	8.57345	7.4228	6.84156	6.93868	9.57895	6.91568	8.6333	8.68991	8.77993	8.85595	8.75944	0.228632
Pde3a	9.26056	9.73526	9.3713	9.73426	9.30168	9.19217	9.47758	8.62985	6.08908	8.68835	5.66742	6.26775	6.46395	5.85275	5.53959	0.0008763	7.95371	7.49009	7.48355	6.0458	6.34519	7.214	6.90553	5.2514	6.22899	7.73257	6.17116	6.12991	5.82482	6.11182	4.62805	0.391343
P2rx2	10.8591	11.2394	11.0715	10.1856	10.8002	10.063	9.95361	9.3351	10.0351	9.7939	5.4804	7.09033	5.54068	4.65893	4.48987	0.000885958	8.18815	7.42918	9.71011	7.10867	5.66058	5.93861	7.85571	5.88661	4.9433	8.03224	4.80084	6.53022	5.88395	6.97683	6.04035	0.285243
Hoxd4	10.1805	9.17738	8.74466	9.45923	5.81252	8.68562	7.68564	7.18536	5.55697	5.45682	5.82831	5.59347	5.22846	6.13259	6.09809	0.000921534	5.39571	6.45425	7.46527	5.18062	5.2462	5.45893	5.62015	5.01787	5.73068	6.55218	4.60593	5.21975	4.97754	5.35999	5.66443	0.75153
Myl10	6.07736	7.92256	6.33187	7.01363	8.98714	9.01197	9.03406	8.07069	9.05561	10.3563	8.54117	9.33768	10.1493	10.6709	10.0469	0.000969373	9.37531	8.34996	7.65023	8.36103	7.39448	8.13438	9.53349	9.07943	10.9767	10.2742	9.86757	11.2099	10.9265	11.7215	11.0095	0.00111874
Ptprm	10.4577	11.2168	10.823	10.3169	10.8028	10.3189	10.3833	10.4257	9.65321	8.94453	10.2701	8.30768	8.26068	6.91534	8.17748	0.000991054	10.4191	10.6172	10.7781	9.71072	9.26643	9.96315	10.3125	9.51549	8.23582	8.68267	9.1997	8.93909	8.23525	7.99207	7.56628	0.00242312
Atp8b5	5.26241	4.79615	6.22825	4.54975	8.03528	7.17297	9.45579	4.55607	10.7956	10.6605	9.45676	10.0258	10.0653	10.2432	9.91494	0.000999583	4.52137	4.59568	4.51355	4.65351	10.0557	7.22009	7.4804	4.59568	9.1233	7.06613	7.40383	8.5393	8.38752	8.69987	7.77194	0.0326652
Olfm1	7.95286	7.84062	7.78259	7.75967	7.53511	7.54034	7.24869	8.20409	6.62867	4.52446	4.9387	6.02872	4.96962	4.54318	4.72624	0.00100422	9.0336	9.20263	7.90344	8.37076	7.79346	9.3817	8.9135	7.56319	6.82707	6.50602	4.69703	6.01052	7.03066	6.39519	5.72233	0.0124714
Rassf9	11.0906	10.7779	10.6255	9.60312	9.92217	9.97247	10.1996	8.92315	9.05912	9.05114	9.2575	8.33358	5.42233	7.55661	7.52446	0.00103105	9.62801	9.94266	9.84903	10.9828	8.3904	8.41616	7.52981	8.76191	8.45994	8.53094	9.75727	6.7597	7.24324	8.66156	7.851	0.0121941
Ddx60	4.47612	4.46973	4.80346	4.46895	8.4007	8.55305	8.25902	8.88097	8.55176	7.93605	5.54068	8.71244	8.32437	7.93521	7.57841	0.00109325	4.47796	4.46657	4.48321	4.47417	8.98516	7.97517	7.91422	7.59785	7.84261	7.003	4.54662	6.93035	7.39808	6.47874	6.2352	0.00737871
Ncoa1	5.24102	5.65563	4.89539	4.7317	7.42148	7.41684	7.3042	7.58857	8.58902	8.85746	6.98552	9.68233	8.66315	7.88268	8.26276	0.00119158	6.51079	7.89197	4.67933	4.62437	6.58051	7.12236	4.65152	7.68871	7.05861	6.65915	4.7836	7.18504	8.17464	7.25323	5.57733	0.853353
Tfpi	6.95044	6.07931	7.40177	5.26109	8.96136	9.14001	8.66754	9.20429	8.95318	9.34928	8.40137	9.64975	10.7125	9.33159	9.12404	0.00132192	5.42882	6.41697	5.52186	5.27967	9.37622	7.43116	7.24707	8.92841	6.09074	5.40446	4.67657	5.35085	5.48077	5.41018	4.98255	0.00561762
Hdc	10.3376	11.4202	10.333	10.4048	11.7858	10.713	11.4627	12.0419	6.28897	8.79014	9.57238	7.37583	8.24726	6.32409	8.23541	0.00132192	10.6313	12.2484	10.4229	10.3116	14.5513	14.2784	12.4449	13.4668	10.3041	9.39075	8.43469	9.81419	10.307	9.14821	9.61546	0.000172819
Serpini1	5.36749	4.51339	4.51188	4.47667	4.56705	7.39167	7.49674	4.4705	9.04572	9.2401	7.61164	10.0626	9.8414	8.62801	9.43338	0.00134806	4.48903	4.49161	4.49904	4.5377	7.8134	5.9798	4.49326	6.65682	10.0333	8.09623	4.79191	8.55111	8.23033	8.70227	8.1804	0.0406858
Ddx4	12.1007	11.4665	11.3817	10.9899	10.8799	10.7485	11.3753	10.4464	10.3239	10.3824	8.82233	11.2556	8.43491	8.12572	8.69134	0.00136241	11.9474	11.3692	10.8862	10.9033	10.4868	10.9084	10.4909	11.3582	11.616	11.3078	11.0523	10.8674	11.2734	11.3096	10.732	0.608796
Asxl3	8.31263	8.63647	9.37664	8.09387	8.75457	7.87268	7.447	7.67635	4.49769	6.6928	5.60846	5.76251	5.81217	5.64753	5.48909	0.00138447	7.75293	8.97107	8.06133	7.5023	4.50654	6.25466	4.52841	5.48286	4.56471	6.19029	4.64625	5.43077	4.56981	4.50699	6.66727	0.0134937
Nes	10.2236	10.5274	10.7075	10.3668	9.59832	9.51668	8.98125	8.03904	8.92626	7.64613	8.86302	8.18609	5.32276	7.95286	6.49577	0.0013987	11.1376	10.0182	9.52365	9.56355	8.22456	8.05335	8.3605	8.61155	4.50877	6.69117	6.97148	4.46878	4.53499	4.46582	6.08469	9.90141e-05
Acp5	13.3528	13.0911	13.5586	12.8017	12.3025	12.5373	12.0716	11.4937	11.6435	12.2811	13.9598	11.2226	9.95591	9.59387	9.96153	0.00142874	12.8648	12.607	12.5351	12.6985	11.9926	11.2113	11.7461	12.1073	11.3909	11.6784	11.7426	10.9746	9.7668	10.7154	9.83151	0.000239409
Tmeff1	10.2606	10.4781	10.1	9.13704	9.64463	9.18203	8.22669	8.36198	8.16919	9.50788	7.74581	8.12531	7.29688	4.55209	4.69766	0.0016118	8.92778	9.67078	9.03112	9.75269	8.49811	5.94144	7.475	8.33304	4.59666	7.84132	7.00959	4.5821	4.55249	4.56386	5.35836	0.00238312
Atp4a	11.719	11.3896	11.3053	11.0022	9.62445	10.4196	9.49629	10.0698	9.14223	8.54221	10.9739	9.20695	8.28001	7.65094	8.58088	0.00161262	12.0155	11.2283	11.23	10.7434	11.0099	11.0101	11.3891	10.763	10.095	10.5746	9.83495	10.6111	9.66648	9.7811	9.98389	0.0179946
Pdgfrb	4.52215	4.4831	4.51198	4.50553	4.63866	4.47636	6.64322	5.70904	6.76147	4.53044	4.48457	7.57244	10.2633	9.04353	9.33816	0.00166516	7.83745	8.2494	8.16735	8.3659	12.5576	12.0126	11.2242	11.6966	10.4938	10.3278	9.91411	11.9214	12.0148	11.7551	11.1766	9.55928e-07
Gstt1	8.00422	7.05734	8.10058	6.14144	8.33188	7.31895	8.23365	7.81835	8.64668	9.58872	8.6744	8.30212	10.7007	10.2084	10.6302	0.00166742	8.08181	4.59794	6.97754	8.45818	7.37315	7.81835	6.28773	7.67241	8.73119	7.7189	7.47862	8.75251	8.86009	9.03554	7.80212	0.448222
Galnt6	7.46088	7.19991	8.51443	5.74264	7.96433	7.46283	8.77157	8.20485	10.5865	10.7736	9.81189	9.32413	10.1596	10.59	10.0763	0.0016847	6.38504	8.19904	7.47032	7.51208	8.90594	7.87138	8.1615	7.96567	9.75823	10.112	9.74792	10.5036	10.6578	11.0795	11.0646	3.09682e-05
Enpp5	7.06717	5.97565	6.00201	7.47887	7.82305	7.4133	8.05622	9.014	9.06596	8.84579	8.5092	9.12145	9.66093	9.56585	9.49586	0.00171039	7.33031	7.37268	4.83615	5.53738	7.89684	5.50162	7.62486	7.88048	7.4513	7.62985	5.26334	8.48319	7.74966	8.89848	7.2224	0.451551
H2-Ab1	7.4446	8.06917	8.10898	8.85874	8.00422	7.22034	8.8356	9.1592	10.3673	9.45551	13.1082	9.1239	12.6535	12.2511	12.7746	0.00196404	11.0226	9.48551	9.77791	10.3255	12.1792	11.9482	14.0967	11.4499	10.9599	11.1532	10.6494	12.561	12.8189	12.8477	12.8137	0.00296208
Akr1c19	4.65871	4.61721	4.65118	4.79999	6.44943	4.88651	4.72323	5.46595	5.07956	6.03691	4.67639	7.90764	9.08227	9.11283	8.72778	0.00231781	4.92919	5.73188	4.66274	5.39415	5.72899	4.74665	5.0527	5.24986	5.91902	5.01421	6.2774	4.72467	5.80002	5.12576	4.66994	0.840094
Plek	7.40177	8.5206	8.65558	8.97865	8.49275	7.30864	9.56585	9.68291	10.058	9.17424	10.5701	9.53116	12.0833	11.3312	11.7442	0.00257107	11.3292	11.9308	11.035	11.7323	13.4542	12.7386	12.2798	12.9922	12.7867	12.4199	12.3662	12.8622	13.1622	13.1288	12.5011	0.00552165
Cxcl9	4.54948	4.52287	5.77623	5.93601	4.55967	6.59781	5.54871	6.58482	7.23837	7.42439	8.36462	7.49478	9.08881	8.22812	8.67941	0.00258038	4.5699	4.64045	4.55392	4.66668	8.8359	4.49362	6.68872	5.29285	8.38463	8.58651	9.68135	8.35953	8.30986	8.44379	9.85714	0.00371967
Upp1	9.05365	9.56176	8.61331	10.3546	12.071	9.95813	12.5389	12.3263	12.1845	12.1145	11.3016	11.3019	12.6624	12.789	12.5881	0.00261595	9.21921	9.75623	10.2992	10.3406	11.6973	10.998	10.3024	10.6775	10.8352	10.3283	11.119	10.6683	9.90632	9.89499	10.7072	0.216804
Setbp1	11.7013	11.8216	11.5415	10.3965	10.508	10.7668	11.348	9.99753	10.5014	10.5128	8.62444	10.4191	8.59749	8.19202	8.31567	0.00288237	7.6162	7.48987	8.39058	7.44389	9.00324	8.41044	5.21755	7.64466	4.7248	4.6805	4.54913	4.82953	4.60746	4.65047	4.74942	0.00501136
Mlph	7.55019	5.04212	4.84384	4.69641	4.48647	4.76408	4.62222	4.59746	5.02417	7.12664	6.78395	5.47368	9.04208	9.52247	8.52998	0.0029062	4.56873	5.32986	4.53094	5.28968	7.27156	5.09736	4.57023	4.71429	5.32488	4.6042	4.9369	6.26097	6.31342	6.93582	5.19326	0.502345
Mpo	13.4051	13.7705	13.3927	14.0977	10.2878	11.1937	10.5207	13.8016	9.84945	10.3106	9.1028	10.0573	10.2977	8.14755	10.2375	0.00298677	16.0737	16.0556	15.4733	15.6706	16.359	16.4718	16.0719	16.504	15.7846	15.5071	15.5238	16.396	16.4663	16.1069	15.764	0.0528165
9630013D21Rik	8.21483	7.70521	7.26494	9.21455	8.57053	9.10782	7.97635	8.91318	8.36034	8.58226	9.31491	9.3785	11.3877	10.6284	10.6667	0.00346109	9.24512	8.71897	9.30452	10.1717	9.31056	9.13894	9.34434	9.12036	8.89766	9.28202	8.93158	11.9592	11.8353	11.3502	11.3519	3.13475e-05
Gpr114	10.0482	9.88132	9.32988	9.30153	8.3308	9.02566	9.49674	8.60988	10.1887	8.95288	9.75896	9.46873	7.86992	5.59859	7.12207	0.0036644	10.6641	11.6222	10.7055	11.1626	12.3637	11.9668	11.8542	11.4111	11.8422	11.3072	11.0674	10.8728	10.5728	10.4825	10.1557	0.0197003
Rapgefl1	10.7935	10.0157	10.4623	9.90041	10.4612	10.4429	10.2686	9.11961	9.6927	10.3207	8.36522	9.31964	8.35879	7.0484	6.88729	0.00368679	9.78667	9.00972	8.87764	7.68057	10.7661	8.96684	9.75797	7.68218	9.52217	8.25256	8.76889	8.94728	7.88207	4.64918	9.76164	0.737668
Cyp27a1	7.82737	8.04616	8.77251	8.7201	9.83433	9.19354	8.55599	9.06964	10.4244	9.21978	7.04244	8.34242	5.16483	6.1123	4.83365	0.00377381	8.35017	8.45463	8.90139	6.36298	7.71404	7.13586	9.20971	7.98012	9.63581	7.52226	7.08258	5.35801	4.62158	6.17574	6.52353	0.0911796
Esr1	7.41604	5.10414	5.35801	4.57452	7.236	6.2967	7.61995	6.56468	9.27013	9.00034	7.43669	8.61086	9.14807	9.30312	9.05561	0.00396847	5.89737	9.46588	6.2668	4.52957	7.85943	7.53029	6.92946	7.17511	8.8805	9.25163	11.4442	9.96435	10.5483	10.3045	9.56382	0.0196252
H2-Ab1	8.83373	7.63599	8.30891	8.99453	8.65794	10.6926	9.29384	9.75065	10.9757	9.99726	13.6506	9.55253	13.3185	12.8045	13.1683	0.0040461	11.4784	10.3034	9.92933	11.4595	12.8257	12.3257	14.4754	12.1051	11.6429	11.6508	12.598	12.9785	13.3816	13.3503	13.1804	0.00941349
Nipa1	6.1542	7.03423	6.47288	7.47316	7.04903	6.87811	8.02914	7.41871	7.8269	8.65862	7.61806	9.10395	9.7933	9.28727	9.60112	0.0042421	7.84062	8.02035	6.9834	7.06045	6.1542	7.93856	7.45619	8.37113	7.97517	6.00162	6.55064	7.78211	7.72423	8.36955	7.76074	0.698638
Apbb2	8.85856	6.7346	6.29829	8.7116	9.82345	10.198	10.1112	10.8163	8.79695	10.0109	9.46169	9.34745	10.8723	10.6993	10.506	0.00426093	9.97569	8.98009	7.9414	7.12989	8.78106	10.6617	10.4457	10.3079	8.85595	10.6152	9.82187	11.8162	11.7534	12.0111	11.2982	0.00918109
Mnda	4.56556	4.50436	4.48574	6.63097	6.70355	6.34607	7.11619	8.08624	6.90274	8.11999	7.35996	8.64401	8.99502	8.42088	8.81121	0.00464134	7.6285	4.54433	7.56628	8.04726	8.47996	9.75455	11.4278	9.17953	7.19319	8.59628	7.9564	7.48935	7.81943	7.51868	8.85492	0.123376
Sub1	9.65359	9.35752	11.239	9.55036	9.69606	10.1301	9.86543	10.305	8.79852	10.181	9.00337	8.66754	7.35788	7.92781	5.81409	0.00497265	9.51695	8.93799	8.24668	8.86696	9.19217	9.35436	8.51239	9.12472	5.80823	8.02395	7.66098	6.51486	8.20273	7.48523	7.90462	0.0581537
Ppp1r2	8.79351	7.45985	8.57086	8.29391	9.35321	9.41445	9.26985	7.38097	9.15147	9.30551	7.42585	7.50428	5.43661	5.75096	4.73767	0.00504044	6.57841	8.45496	5.88661	4.86721	5.33084	7.47769	8.04396	7.53071	4.90662	7.77329	5.73829	7.77438	6.92788	7.54687	4.71846	0.935387
Phactr1	6.62944	9.06762	9.11824	7.77308	9.84314	9.36814	9.94614	9.15031	9.9653	10.4559	9.6894	9.95787	11.1769	10.9278	10.8929	0.00509987	6.81808	9.29645	8.04974	7.11715	7.71159	6.39633	7.55746	7.23665	6.35712	7.13465	6.54988	9.36969	8.48033	8.19033	8.142	0.185113
Fmn1	6.31937	7.97351	8.62575	9.64165	8.83225	9.20333	9.2283	9.05017	10.3742	10.8759	11.604	9.45848	11.3193	11.3981	11.4869	0.00536519	9.70313	9.13937	9.57434	9.66263	7.90281	9.66896	10.1433	9.53793	8.70906	9.27774	10.1487	9.74346	8.99235	9.15547	10.1716	0.996138
4930404K06Rik	9.24166	8.51899	7.9689	6.98399	4.58742	6.25876	4.6327	4.63872	5.29257	5.20723	6.86634	4.66	4.73892	5.39884	4.74886	0.00560128	4.62805	5.84395	4.58537	8.52849	6.75012	4.55245	4.64688	7.56454	5.46508	4.65047	8.95969	4.611	4.81144	5.0398	4.52907	0.779729
Rgs9	5.26724	4.54299	6.77958	4.56783	6.91203	9.1019	8.09514	8.15498	7.07814	8.91751	8.30874	8.96436	9.33266	9.50121	7.85589	0.00644514	4.60113	4.63714	7.72247	4.56948	9.23047	6.80947	6.54786	6.82741	8.07946	8.04726	9.43497	5.4842	7.30212	8.04192	6.84834	0.144677
Krtap6-5	5.31952	5.66443	6.02757	6.0875	6.14105	6.0895	6.63436	7.2482	6.18488	6.34379	7.81139	8.23669	9.02582	8.77081	9.04502	0.0066795	6.34686	5.47894	7.16973	5.09164	6.41398	6.92454	5.74567	4.85067	5.29441	6.13303	5.03848	6.19252	6.50241	6.07583	5.09881	0.953544
Elavl4	9.27735	9.44626	9.39781	7.57683	9.70656	8.42325	7.65924	7.5358	6.84688	8.04993	4.72374	4.75649	4.90581	4.99868	4.64186	0.00706313	6.09968	7.97476	6.34021	5.93754	5.8641	4.67933	5.67216	5.29257	6.00667	4.82351	6.03144	4.73451	5.43694	5.34626	4.61981	0.268273
A630081J09Rik	9.24917	6.64648	9.66281	6.78443	10.8157	10.715	10.68	10.3116	11.5857	11.2956	10.1766	10.6204	11.0253	11.1834	10.8668	0.00706313	8.18169	10.425	7.97807	7.40315	9.53746	8.57945	8.16641	8.14015	10.1582	10.032	10.0592	10.6456	10.2858	10.9636	10.4911	0.0268965
Krt10	9.70471	9.46345	9.85079	8.93143	10.2855	9.03755	9.68741	8.66871	9.91325	8.90057	8.00941	8.02076	7.60705	6.45107	5.98108	0.00717267	10.2909	10.3003	9.82673	9.55533	9.42871	8.88315	10.159	8.92586	9.33357	9.55196	8.83654	9.01812	8.26201	8.42512	9.4117	0.158129
Dusp22	6.5944	8.43109	7.5601	7.56087	8.79695	8.07786	9.14921	7.3399	7.3399	8.97809	5.89982	7.64466	4.59281	4.59125	4.60681	0.00763351	6.84289	4.70273	7.35102	5.81467	4.61254	7.29402	5.78563	7.83696	6.77428	7.16874	4.87936	4.5982	4.65786	6.51145	4.86998	0.740312
AK142557	8.0556	9.0724	8.14495	8.61831	4.68275	8.13532	4.69553	4.69311	4.74483	4.85272	5.97156	4.70749	4.82657	4.6976	5.36067	0.00772858	5.56513	5.47806	7.26543	4.99782	5.12025	4.77011	5.09695	5.15202	5.62724	5.05682	6.08395	4.72267	5.7434	6.83577	4.74343	0.844013
C230094B09Rik	6.47497	7.83285	5.09135	7.78325	8.522	8.34996	8.85448	7.21035	8.71345	8.72502	8.61425	9.80077	10.6541	10.3913	9.68055	0.0077339	9.13831	5.34002	7.6962	5.12817	8.70647	8.86499	6.49955	9.44132	9.03033	8.44249	8.15121	10.1284	9.44726	10.1282	9.28727	0.133774
Lrtm2	4.47769	6.17044	4.99965	6.42286	4.4743	8.32309	4.54383	4.52983	8.53131	8.73519	7.00324	8.48221	9.33661	9.82813	9.14153	0.00835378	7.67763	4.63554	5.47937	10.6738	10.165	7.24573	4.51665	4.59876	9.95547	7.73213	11.0763	8.65363	9.04143	8.82659	7.81112	0.4866
Olfr631	10.7799	10.1011	10.8627	8.85798	8.20969	10.2358	10.032	8.51899	8.86808	10.3387	8.77454	9.63927	6.07067	7.80232	6.19666	0.00959946	4.54433	4.62045	8.30784	4.70631	4.69455	5.96063	4.53865	7.42308	4.69696	4.60436	4.86385	4.55194	4.68218	4.59434	4.4984	0.754823
Pira7	9.64665	8.4516	9.41058	5.05047	7.90363	9.69934	9.21545	8.95757	9.23213	9.89315	11.6916	8.89892	4.90869	4.99237	4.96655	0.0100552	10.3022	10.5188	9.83322	9.48368	10.6507	9.95901	10.3742	8.74658	11.0665	10.9138	10.2619	9.60013	7.79233	8.84918	9.41842	0.102399
Nrxn3	8.32711	7.81356	7.22618	7.1983	5.1925	5.83278	7.49207	4.99562	5.02143	4.8367	6.01583	4.69497	4.76064	4.66124	4.63108	0.0103139	4.70713	5.2229	4.8979	4.77192	4.80378	4.86998	4.88632	4.63385	4.81562	4.75842	5.59988	4.94887	5.83231	4.79133	4.72209	0.976628
Ubxn4	5.79911	5.28682	4.74291	5.26604	7.65623	6.93169	8.1102	8.30929	8.08471	7.96247	5.37697	9.38834	9.33326	9.18188	8.77721	0.0104784	6.99343	8.01955	5.75222	4.89094	9.10145	7.94744	6.83215	8.32785	5.81286	5.53515	7.5577	7.86122	8.13101	7.66695	5.30145	0.469026
Garem	9.10816	8.78831	7.79704	8.79428	7.72201	6.52057	7.80373	8.71472	5.00862	4.86095	8.1063	4.61139	4.68731	5.49718	4.75062	0.0104906	10.1546	7.33909	7.82135	8.88825	5.41265	9.7802	9.10026	7.98483	5.25767	4.58955	9.10395	9.20875	7.76477	7.84786	4.4778	0.678983
Hvcn1	4.56041	4.62475	5.21975	4.82245	8.70724	4.8062	6.61135	7.01657	7.56181	7.41604	10.2354	7.73146	8.30968	8.76227	9.47407	0.0105584	4.60656	5.82831	7.2122	7.18993	9.96424	8.93383	7.08833	8.86696	9.15195	9.1442	7.85512	11.0034	9.58095	9.60454	9.08432	0.0139613
Plcd3	9.19267	9.57094	8.86164	7.67028	9.62953	9.86871	9.8458	8.32145	8.96745	8.08471	6.56052	8.11624	6.76383	6.42785	4.77987	0.0107215	9.20804	9.3746	8.81004	8.81846	10.4322	9.86499	9.18883	9.51695	9.73332	9.3114	9.48167	9.66597	8.99597	8.91132	8.53542	0.338853
Usp53	9.24054	8.33679	8.98125	8.10408	9.96478	7.65814	9.43525	9.11681	9.44459	9.13177	6.06946	8.8359	5.18871	4.60532	6.01915	0.0109834	7.7061	4.68946	7.80966	4.7903	4.75734	7.65768	7.49907	7.2963	7.52549	4.68188	5.36408	6.86011	4.78675	7.23362	7.64933	0.941774
Gltpd1	6.64777	5.47894	5.09465	8.54784	8.27842	9.71414	9.09499	9.89186	8.75264	9.72974	9.023	9.74164	9.79341	9.30783	8.79285	0.0112526	9.24576	9.28088	8.27592	8.85903	9.18114	9.33893	8.73068	9.07843	9.32383	8.09165	8.94512	9.22075	9.74746	9.82939	9.1778	0.527857
Snx24	5.5134	4.97989	4.47928	7.68311	6.71839	4.46535	6.78624	7.95114	8.1615	8.4915	8.26486	10.1883	9.5252	9.47114	9.52396	0.011346	6.76005	4.51299	8.03564	6.66854	8.43453	7.45436	4.5413	8.84333	7.89928	6.49273	4.48316	7.66809	7.26363	8.17194	7.67498	0.760659
Ankrd63	4.88699	5.20962	4.87068	7.05766	7.24046	8.55254	7.14117	9.81277	4.57481	6.97943	6.56513	6.74078	8.98327	9.28845	9.11373	0.011346	5.53036	4.54325	4.57152	4.55179	4.84803	4.56796	4.55477	6.4225	4.52215	4.5523	7.91908	4.58542	4.57283	5.95633	4.57224	0.903232
Cd200r3	7.94661	9.26339	8.20056	7.98012	5.51804	7.70238	8.03799	6.04168	8.58685	7.67987	7.92496	8.49416	5.65828	5.0799	5.44942	0.0114711	5.98362	6.39478	5.96575	5.10414	9.2229	7.89642	5.5812	6.20485	5.64753	8.19674	4.63415	5.4409	5.08593	5.3137	5.43728	0.458552
Xrcc2	9.84314	10.7407	10.8491	9.49397	10.1214	10.4544	9.45167	9.03227	11.2912	9.66984	9.00083	8.97296	6.98997	8.29462	6.29324	0.0120091	9.67409	10.4116	9.11873	9.50197	9.3479	9.04991	10.1441	9.17982	9.95868	9.85507	8.87824	9.47732	9.05316	9.35542	7.97888	0.656023
Ptpn3	8.71297	6.52608	5.22878	7.93338	8.20073	9.83194	8.66011	8.73763	10.9294	9.60643	8.82111	9.75515	10.6433	11.2028	10.1238	0.0120149	9.13493	8.85504	8.32093	8.8432	6.47745	9.05261	4.46912	8.95893	9.61032	9.76972	9.9565	10.8527	11.1233	11.6683	10.5204	0.0191468
Bcan	8.81555	10.1225	9.73388	8.90196	9.43656	9.92786	9.39047	8.4055	9.82741	7.95217	8.19749	7.46964	5.49757	7.47887	6.41492	0.012158	8.4856	8.78199	8.20056	6.53286	9.31289	7.28607	8.35036	7.13347	6.31806	6.37572	6.34851	5.98769	5.93901	5.5215	7.66364	0.141517
Glrx2	4.67555	4.65384	4.68772	7.8778	8.29683	7.69818	8.18169	9.70183	7.12964	8.0046	7.9304	10.496	10.1182	10.2035	9.35496	0.0121838	7.54419	5.48997	4.84642	5.27657	7.59533	9.34274	4.8976	9.45325	5.34255	4.98434	6.20226	7.89122	5.78223	6.26749	6.87956	0.365862
Rorc	4.95185	7.73961	7.50354	7.92148	6.77958	6.97045	6.91171	8.27457	9.36397	7.01458	8.8285	8.56231	10.6343	10.6698	9.94718	0.0139269	8.31846	9.75854	8.35581	7.33551	10.1391	9.4213	9.35711	8.75987	7.42024	9.47201	8.07946	8.4539	8.52168	9.09711	9.24039	0.518324
Acp5	11.3604	11.3015	11.7688	11.2271	10.6756	10.892	10.0385	9.76772	10.141	10.6563	12.4482	9.36995	9.3981	7.23943	8.26427	0.014045	11.4066	11.1114	10.9163	11.1683	10.678	9.27421	10.1304	10.3443	9.62463	9.84232	9.68615	9.03993	6.85529	8.9712	6.61414	0.00226981
Tmc7	11.0694	10.4245	10.5575	9.1119	11.0332	10.278	8.4031	9.1496	8.78633	7.92378	9.17722	6.35885	4.67878	4.68804	8.28412	0.0141599	8.56409	8.5073	7.497	8.07028	5.56261	5.21325	8.44504	8.22647	6.6436	4.6293	5.04615	7.27431	4.97962	4.78955	7.77129	0.253159
D10Ertd755e	10.4716	9.50894	10.3482	8.889	9.38915	10.2295	9.38384	9.85211	8.4095	8.71375	9.46257	8.92242	8.79529	4.5479	5.56118	0.014569	8.71375	9.99488	9.46808	8.78481	9.34337	9.35411	9.20061	8.26465	4.58121	4.6613	6.97754	4.70735	4.59297	4.63238	4.73722	3.33984e-05
Gabbr1	6.84189	7.58672	7.77668	9.5607	8.85247	8.82152	9.49598	10.1711	8.63986	9.84568	9.32704	10.8055	11.191	11.1528	10.6879	0.0147791	7.89684	4.74735	5.98606	4.55407	6.6974	8.74269	4.79775	8.87024	8.50434	8.33719	8.24958	9.76016	8.94243	9.87874	8.89612	0.0607874
Car8	4.54908	4.51904	5.25236	5.32238	6.29522	5.76935	6.60157	7.59312	4.55543	6.34975	7.83977	8.62316	8.92544	9.01045	8.9645	0.015062	4.56066	4.61814	6.40901	4.64389	4.61131	4.49546	4.59016	4.6129	4.64688	4.59871	4.88875	4.52401	4.63901	4.57987	4.56801	0.888569
Nid1	7.79597	8.08163	8.69259	7.3126	7.72047	6.34487	6.76761	7.61995	6.60761	7.60819	4.59985	5.69442	4.6858	4.65367	4.91053	0.015062	4.76777	5.04518	4.66285	4.78487	4.77498	4.67794	4.90378	4.82796	4.95026	4.8545	5.75178	4.66866	5.21799	4.72467	4.69823	0.929085
Cd209a	7.521	8.16132	6.98036	7.14477	7.22206	4.71925	7.10149	7.40833	4.75304	4.63504	4.58995	6.19065	4.64284	4.62264	4.49376	0.0156251	4.57611	4.71518	7.6531	4.90786	4.97202	4.59543	4.57074	4.62401	4.88307	4.63595	5.04883	4.58084	4.77552	4.64874	4.48944	0.772189
Cxcr1	6.63644	7.93981	6.83856	6.56052	8.59878	8.5439	7.67306	6.2967	7.43845	9.04732	6.61773	8.25867	10.239	10.8185	9.67789	0.0162944	6.81519	4.51752	7.12755	8.83439	4.56523	6.94789	4.47812	7.86439	8.81864	8.28111	11.2485	8.9417	9.73767	8.77571	8.62462	0.073599
Mlxip	4.56999	5.19876	5.04308	7.06517	7.79827	7.7189	7.08741	8.62705	7.38143	8.29039	6.72368	7.99484	8.42792	8.477	7.83101	0.0165743	7.73761	7.04452	5.26604	8.15836	6.43418	7.7675	7.25489	7.82966	4.52693	7.48963	7.97635	8.38582	7.57751	8.58513	6.88863	0.809387
Ccdc112	4.60415	5.36442	4.83028	4.55923	4.9682	5.76083	5.92991	6.84093	4.72431	7.04935	6.349	9.09698	9.26668	8.82909	8.24129	0.016674	5.55593	4.6858	4.68429	4.55442	4.61486	5.97156	6.00828	6.9352	4.55313	4.60582	4.5237	4.68305	4.57194	4.6293	4.64296	0.272002
Plscr4	5.55274	6.63644	7.79062	6.53332	8.78713	8.99144	8.86526	8.11643	11.0941	9.99061	7.65214	9.03768	9.35496	9.63594	9.12375	0.0167158	4.61427	4.66274	5.30078	4.58127	4.60928	6.99702	7.51814	6.69117	7.5689	7.39297	7.74783	8.02359	8.08393	7.3216	6.96847	0.0137988
Fbxl7	8.39144	7.57778	9.71534	7.2541	8.02236	4.46376	7.21597	4.52451	4.52215	4.50671	4.48913	5.62918	4.47003	4.48422	4.73562	0.0169113	6.26381	4.53286	8.32495	4.47591	4.51345	4.5396	4.56929	6.37689	4.50369	6.62337	6.7412	4.55566	4.46793	4.51255	4.58284	0.599194
1700016G14Rik	10.7579	10.2199	9.62516	9.49586	10.6764	9.86743	8.81238	9.22047	8.77061	7.65023	9.00571	9.87738	6.1354	7.41871	8.09934	0.0171878	9.01609	9.86342	10.0584	9.6212	9.80501	9.56878	10.9678	8.99987	6.08908	10.3139	8.18929	10.0263	8.53271	8.78404	7.60364	0.452294
Nfib	8.39685	9.13908	8.75251	6.84619	4.49091	8.16279	4.5581	4.56724	4.68165	4.65736	6.00201	4.55923	4.65411	4.65981	4.89118	0.01761	4.54059	7.31496	6.19215	8.08297	6.75273	4.46599	4.57288	6.31142	4.85185	4.59717	8.13438	4.52928	4.69676	4.66511	4.48321	0.521627
Entpd3	5.00687	6.29948	7.44003	5.52363	4.63812	8.28199	9.94979	9.20079	10.0851	10.0113	9.29588	10.5483	9.98821	10.005	9.52201	0.0197838	7.2746	4.55788	7.13107	4.59652	8.21264	7.85855	6.37061	7.31574	4.577	4.83347	4.72055	7.47106	7.70287	7.32344	7.41309	0.040782
Gda	4.58372	5.55697	5.37411	6.82017	7.75191	7.13638	4.68711	7.4277	6.59149	9.38898	6.55726	6.77172	9.78636	10.0373	9.24978	0.0199763	4.63238	4.64896	6.1829	7.28607	4.84135	5.26411	6.37607	7.18124	4.53687	6.56012	4.99906	5.94397	6.87379	5.70199	7.79975	0.774645
Srgap1	9.70729	10.268	9.10537	9.37417	7.33429	5.87648	6.02669	9.22778	8.39438	4.62457	4.92145	7.72577	5.15655	5.68973	4.50509	0.0201483	9.75286	9.71156	9.71957	7.39992	9.39184	9.58814	8.17483	9.34947	9.47114	9.03181	9.15254	8.08943	6.11057	6.24789	4.50827	0.0190127
Adam8	8.62076	9.04039	9.38717	7.05169	8.74818	8.45006	9.65525	8.7747	8.30968	8.56107	9.57386	7.35497	4.60939	7.39886	4.65617	0.0206082	7.44857	5.42652	8.66455	4.74149	9.37745	9.19354	8.95256	8.80371	4.84043	5.64753	4.77586	6.91006	6.953	4.76187	4.80688	0.021262
Sbf2	8.89785	8.6472	8.69737	8.17597	9.51348	8.19475	8.05987	7.66716	5.96431	8.73553	6.01714	7.74764	5.78223	5.21465	6.09416	0.0213819	7.50783	7.17799	6.3634	6.03726	6.06117	5.24685	5.24884	5.62293	6.31178	6.12655	6.39364	4.91943	7.80902	5.48286	4.69801	0.559442
Nrxn3	9.95988	7.98387	8.49171	5.18681	4.65943	5.7979	4.68854	4.66424	4.82953	4.88933	5.25309	4.67181	4.80888	4.7544	4.62247	0.0216716	4.78468	5.38884	4.64839	5.14952	5.34478	4.68804	4.92538	5.09255	5.61022	4.90893	6.1492	4.68124	5.54713	4.91641	4.65357	0.820576
A730028G07Rik	5.11997	6.10521	4.48463	6.28806	4.58532	7.56338	5.40226	6.59781	9.02598	7.91989	6.42501	9.69893	9.24757	8.61021	8.38582	0.0218699	4.53069	6.92979	4.64874	6.50913	4.49466	4.50112	4.53183	8.07248	8.21184	5.85863	4.48889	7.47147	6.93646	8.05987	6.12991	0.622863
Phlda2	4.57393	4.65491	4.62882	4.82796	7.01205	4.86876	4.67555	4.65157	8.58072	7.09472	5.0039	5.30181	8.16473	7.83445	9.17083	0.0224299	4.60385	5.88395	4.55845	5.53073	5.59576	4.65503	4.59438	4.84444	5.59947	4.62873	5.2343	4.6513	5.15898	5.10016	4.50654	0.974442
Pard6b	11.1317	11.0332	11.3481	9.96165	11.9144	10.6548	11.0088	9.21469	10.325	11.0597	8.95986	8.59444	7.44264	8.58884	8.02359	0.0224925	10.7455	11.0602	10.7844	10.459	9.93296	8.86385	10.0756	8.45856	10.1656	9.96449	8.01878	9.24994	8.25544	8.96513	8.36316	0.0467768
Kcnb1	4.54802	7.40735	4.5691	7.05707	8.21665	5.74822	6.43418	8.22384	7.72332	8.56723	8.92573	9.70029	9.44856	9.46192	9.22708	0.02299	8.22456	8.7375	7.13638	4.55835	9.30366	8.68524	4.59722	7.1469	7.85651	8.53303	9.49216	9.02191	7.57633	8.51603	7.80087	0.767995
Stxbp5	5.36097	5.43034	4.89161	4.73288	8.19674	5.67844	6.88112	8.25134	7.2526	7.50955	6.03887	8.2004	8.01822	8.21325	7.7284	0.0234194	5.74945	5.61471	4.55723	5.46029	5.69485	5.0551	4.60091	4.75418	6.60157	5.72713	5.19031	7.55386	7.5985	7.32048	6.37525	0.0360129
Pex26	4.81037	5.10253	4.69483	7.4277	5.64908	6.35454	5.16852	5.72326	5.67362	6.75585	5.63827	8.56032	8.88328	8.73038	8.95495	0.0251994	7.35973	5.75052	6.47665	4.66381	8.65707	6.61414	7.83718	8.7375	7.13754	7.21454	4.62179	7.93771	5.46249	7.08654	7.45739	0.394923
Flrt3	8.9087	8.69259	9.42579	7.42876	4.64943	8.31376	4.52918	6.79566	9.13009	7.58286	7.40177	8.52556	5.24924	5.65449	5.0537	0.0253717	7.77995	8.8208	8.92066	8.31909	7.33449	5.21829	5.90924	4.56004	4.57127	5.75569	7.31239	4.57039	6.50602	4.53605	6.18841	0.0407413
H2-Eb1	8.76257	6.91534	7.56678	8.6664	8.79543	4.53636	6.72268	9.82925	10.5563	9.79949	14.7476	8.99615	13.8332	12.9222	13.6769	0.0255427	11.1844	7.78681	10.5073	11.4114	13.2235	12.4117	14.7679	10.7247	10.8217	10.5507	10.4709	13.5238	13.3755	12.8689	12.8948	0.0540718
Reep1	9.17953	8.5925	8.54645	8.04726	9.39108	8.75944	6.78482	8.12835	8.28147	7.94847	6.1442	8.82909	6.6436	4.62247	4.75526	0.0258854	8.35315	8.43779	8.04509	4.51512	8.08571	7.78847	7.53749	8.54851	4.51158	4.47488	4.58762	4.46748	6.42911	4.46663	7.04486	0.0550832
Plxna4	4.60725	5.45185	5.37988	4.72134	4.63226	4.75574	7.05169	4.64274	7.74438	5.00798	6.21575	5.43113	8.11372	9.5463	7.47293	0.0261099	4.68568	5.53036	4.61516	5.46159	5.62101	4.60878	6.18333	4.97583	5.58061	4.75003	5.86719	7.32286	5.47442	6.5919	6.6776	0.292919
Rnf180	4.63788	4.68179	4.66569	4.84023	7.89161	5.00536	5.66087	4.73535	6.47497	5.29742	5.02167	8.14092	8.73791	8.13183	8.39458	0.0262026	6.40094	6.18488	4.64382	5.83406	7.9418	8.13101	8.62895	7.72224	5.97643	7.79617	5.77623	7.61995	7.6645	8.00484	7.75646	0.0273015
Armc2	8.23451	9.05114	6.90274	7.04098	7.76269	8.256	8.07167	7.53467	7.57841	8.28447	4.47801	7.5165	4.52243	4.47215	4.70189	0.026842	7.40526	4.47271	5.84986	4.48079	4.46429	4.53409	4.48179	4.48333	4.48975	7.19376	4.54884	6.10185	6.80552	4.46577	4.53687	0.788668
TC1762818	10.1689	8.40791	8.40791	4.65543	4.51938	4.69709	4.58263	4.58852	4.77621	4.73625	4.64115	4.58981	4.6744	5.35965	4.53736	0.0269579	4.57358	5.0254	4.55098	5.17957	5.22743	4.4722	4.60746	5.56703	5.03792	4.62469	5.13029	4.55413	4.72764	4.73091	4.49461	0.957456
Asxl3	9.57122	10.2428	9.93266	9.29719	8.94929	9.36696	7.41165	8.32221	8.10612	4.49765	6.47246	8.86632	6.21221	7.04787	6.0536	0.0291358	7.03696	8.88474	8.17194	8.56071	7.04668	7.53844	6.39204	8.23772	4.49388	5.46724	4.47827	6.11993	4.46517	6.17857	5.82633	0.00606297
Ptger4	4.9256	5.71476	7.67263	9.13974	7.0892	8.7142	9.57622	9.58181	9.98679	10.8359	9.50758	10.4703	9.99286	10.6819	9.26741	0.0305847	8.49703	9.52698	8.93925	8.37949	8.44379	9.59387	10.0333	9.39092	9.90446	9.23213	8.16641	11.0196	10.3318	9.85225	9.5923	0.216686
Tmem243	6.11307	5.77921	5.49757	8.21521	8.52556	5.35486	9.2111	9.02161	8.85809	9.59073	10.0185	9.96462	9.48236	10.0408	8.84562	0.0324397	7.85021	6.57574	7.82047	6.0879	6.0571	9.26324	9.0752	8.69599	8.79255	10.3509	8.27877	10.3306	10.331	10.357	9.14971	0.0509862
Tspan18	7.46917	8.62241	9.41183	8.71596	8.64117	5.35013	7.26997	7.15943	5.29364	6.05885	6.99821	6.04313	6.14144	4.69476	5.80778	0.0329523	9.41741	8.45312	9.02434	9.409	8.2563	6.72681	7.87799	7.74111	7.74277	7.73717	4.60981	7.35412	4.72245	6.46659	4.87508	0.0492407
Tff1	9.11037	9.41934	8.91148	9.98402	4.52188	4.54667	8.87904	7.58033	4.47863	7.9095	5.47806	6.24671	4.54068	6.20449	4.4738	0.0332514	12.0532	12.5275	11.9054	12.2146	11.8043	10.7432	10.1807	10.7435	9.39033	9.64524	9.72569	9.07912	4.53539	8.61561	8.24866	0.00296695
Mrc2	8.03126	8.58188	9.20429	8.98754	6.81584	7.1876	6.70993	7.85406	7.01427	7.53657	4.74654	5.62242	7.17824	5.56153	5.09881	0.0336397	7.67672	10.7364	9.45565	10.4192	6.02058	6.85807	8.18566	7.58901	7.89397	7.3718	8.05321	4.92365	6.91102	9.11936	5.4961	0.131056
Pde8a	6.51611	4.9433	4.46735	4.50133	8.50989	5.77834	6.87277	8.04706	6.6173	7.01952	5.46999	7.70065	8.35144	8.56492	7.85528	0.0358746	6.95551	7.37614	5.13339	7.38686	7.56628	7.0083	4.49184	8.15575	7.77561	5.78175	4.5879	6.89505	6.23832	7.31239	6.5177	0.953403
Arhgef28	5.34595	6.35885	7.62894	7.61436	7.53125	8.45198	6.79826	8.27115	7.76333	7.83141	6.93483	5.80732	9.81132	9.27421	9.4233	0.0362495	9.74537	8.08297	7.33596	8.10862	8.20258	6.68402	4.72307	7.15837	6.79752	7.29937	5.97051	9.30981	7.95702	8.10612	8.82999	0.174583
Pcgf5	4.74563	4.81811	4.49611	4.57933	6.28099	6.30983	5.72899	7.68144	6.33239	7.62106	4.77464	9.57314	9.64917	8.23907	7.59661	0.0402931	6.29522	4.53859	5.66443	4.47623	7.13164	7.9095	6.92612	8.81957	8.77143	7.15811	4.4704	7.5604	7.30981	5.79473	6.14881	0.264789
Fam101b	6.87136	7.81049	6.84254	8.5749	9.36901	9.20095	5.59703	8.42287	6.96598	4.60612	5.13339	6.74199	4.5026	4.56056	5.20153	0.0407782	7.3857	4.66987	4.64625	4.56061	4.59906	8.26617	7.19177	8.60243	4.64025	4.60587	7.56678	4.68836	4.57027	7.44877	4.69863	0.576777
Cpe	11.337	9.9849	9.29645	8.69259	8.427	9.7304	8.78185	7.99784	8.23827	5.02604	8.1804	7.83101	7.22355	5.36749	7.25383	0.0409525	7.81183	9.31289	6.27254	7.76729	6.65682	6.66727	4.6586	7.26788	7.16023	4.66723	7.31182	5.80217	4.84067	4.92689	6.49577	0.290463
Cachd1	8.99046	8.46414	7.45886	7.96433	4.4928	8.36168	5.54713	5.47937	6.60198	6.21756	5.75745	5.9798	5.44168	5.67807	4.53621	0.0425811	5.49567	6.94543	6.99088	6.51442	7.91233	6.77503	5.42753	7.42941	7.28557	4.60553	5.45136	4.60043	4.96501	6.47665	4.48376	0.37566
Lrr1	9.08185	8.52913	7.39836	9.07671	9.02889	7.00167	4.59322	7.45739	4.9555	6.24671	4.65746	6.92344	4.68429	5.75441	4.86432	0.0426802	9.83064	10.0886	9.40887	8.33397	9.27789	9.0463	10.2707	9.08655	8.99579	8.58036	9.25075	8.40601	8.13605	8.42897	7.93316	0.147102
Tcf7l2	9.44981	9.20585	9.09711	6.68916	9.96668	9.4503	9.34947	8.03064	9.87874	10.0329	5.46323	8.23653	5.95339	4.76015	5.02916	0.0426964	6.69895	5.42139	5.75052	5.16852	5.395	8.06506	7.92618	8.00564	7.39728	8.04974	6.81259	4.68387	5.57373	4.93426	4.6551	0.0429095
Tff1	9.50077	9.68978	9.30981	9.94266	8.41469	5.34174	9.32687	8.49462	6.71839	8.05909	7.35761	6.41742	6.6173	7.39144	5.92688	0.0428277	12.122	12.5359	11.8359	12.2401	11.871	10.9268	10.2731	10.8076	9.7323	9.62249	9.66693	9.68482	7.43484	7.13135	8.60189	0.000154837
Dynap	8.67549	8.62331	7.90546	6.00976	4.94159	6.88575	4.8555	4.72441	4.85255	4.71111	6.77321	5.23748	5.88074	4.6229	4.60191	0.0455327	4.66361	4.81646	6.53937	8.06257	7.58741	4.71024	4.71429	4.59834	4.72597	4.75364	7.28128	5.5391	5.31173	4.67963	4.65605	0.910833
Gen1	10.1671	9.73616	5.61508	8.05987	9.64205	9.58814	9.09251	7.45035	9.54084	8.45908	6.82232	8.03863	4.6855	5.54237	5.22477	0.0466723	9.30628	9.79218	9.27116	9.28654	9.32805	9.47643	9.53529	8.37966	9.85225	8.7564	8.93707	8.35581	7.32403	8.79543	8.41845	0.171877
D930001M23Rik	4.68724	4.66488	5.00101	4.77437	6.44315	8.05987	5.05976	5.54347	5.49481	7.62759	4.59475	5.01365	8.47131	8.49889	7.09618	0.0498981	4.85508	5.7616	4.88699	10.5816	5.532	4.81772	4.97802	4.67305	5.6282	5.08136	10.8875	5.06288	6.54786	4.98076	6.1382	0.722998
