# Supplementary material for: Fetal and neonatal hematopoietic progenitors are functionally and transcriptionally resistant to Flt3-ITD mutations
Source: eLife. 2016 Nov 23;5:e18882. doi: 10.7554/eLife.18882 (PMC5153248; doi:10.7554/eLife.18882)
Supplement: Figure 9—source data 1. — Genes that are differentially expressed (Adjusted p<0.05, fold change ≥ 3) in Flt3ITD/+; Runx1Δ/+ HPCs at P0 and P14 are shown in the indicated tables. DOI: http://dx.doi.org/10.7554/eLife.18882.021 [file elife-18882-fig9-data1.xlsx]

## Sheet: Table S3
Figure 9 - source data table 1. Genes that were significantly, differentially expressed (adj. p<0.05, fold change ≥3) in Flt3 ITD/+; Runx1 f/+;Vav-Cre HPCs relative to wild type at P0 and P14
Significantly, differentially expressed at P0
	P0		P14
Gene	Flt3-ITD/Runx1 vs. wild type	adj.p	Flt3-ITD/Runx1 vs. wild type	adj.p
Nov	50.6491	0.00013395	47.9114	0.000127728
Mboat2	29.9338	0.00394753	18.0614	0.0245456
Enah	12.861	0.00310298	70.1202	0.000342525
Mboat2	9.72965	0.0249487	12.7339	0.000770914
Socs2	6.49721	0.000588217	16.4296	0.000134229
Socs2	4.77784	0.00310298	17.2195	0.000127728
Ccdc64	3.74691	0.0172345	4.06027	0.000174751
E130215H24Rik	-6.41982	0.0321813	-2.59058	0.184815
St8sia1	-9.30878	0.00607636	-18.5004	0.00335253
Ccr9	-12.3325	0.00455169	-18.6485	0.0358319
Significantly, differentially expressed at P14
	P0		P14
Gene	Flt3-ITD/Runx1 vs. wild type	adj.p	Flt3-ITD/Runx1 vs. wild type	adj.p
Enah	12.861	0.00310298	70.1202	0.000342525
E330020D12Rik	6.15123	0.663482	61.8285	0.00656236
Adgre1	2.1858	0.999997	50.2245	0.000785101
Nov	50.6491	0.00013395	47.9114	0.000127728
Sema4a	3.32931	0.999997	38.5068	0.00612749
Syn3	4.0658	0.46953	20.8141	0.000127728
Nhsl2	4.4484	0.999997	20.7003	0.00525483
Sparc	4.74609	0.0592039	20.4038	0.000127728
Akr1c19	6.78663	0.0875703	18.6805	0.0197603
Adgre1	3.84194	0.508974	18.1363	0.00216593
Bhlhe40	20.1196	0.078916	18.0864	0.00595318
Mboat2	29.9338	0.00394753	18.0614	0.0245456
Socs2	4.77784	0.00310298	17.2195	0.000127728
Socs2	6.49721	0.000588217	16.4296	0.000134229
Lrp1	1.60212	0.999997	15.3872	0.0120462
Gldc	4.14774	0.446785	13.9763	0.0368474
Prr15	7.60121	0.588112	13.9239	0.0139943
Mboat2	9.72965	0.0249487	12.7339	0.000770914
D430019H16Rik	4.06884	0.078916	12.6811	0.000451035
Id1	2.93128	0.0852877	12.5842	0.0378344
Ctsg	-1.05714	0.999997	12.0407	0.000432937
B4galnt4	2.61454	0.999997	11.9087	0.0190907
Epb4.1l4b	3.30181	0.999997	9.8581	0.0157923
Mcpt8	1.79114	0.999997	8.88581	0.0154301
S1pr3	2.41042	0.999997	8.87611	0.00180711
Nhsl2	1.49206	0.999997	8.29039	0.00450211
Slfn2	3.97011	0.0987286	8.04323	0.00282624
Sparc	1.89151	0.999997	7.77085	0.036057
D630039A03Rik	3.64972	0.112707	7.72892	0.00117241
Rasgrf2	2.82884	0.509555	7.63578	0.00516183
Runx1	1.38036	0.999997	7.21263	0.000785101
Rab44	1.66745	0.580486	7.05575	0.000127728
Tnfrsf25	2.80606	0.310299	6.90133	0.00522068
Phldb2	7.4811	0.310299	6.86202	0.0271727
Clec10a	2.72577	0.999997	6.69043	0.00211075
Clec10a	3.30012	0.118391	6.58245	0.00193516
Camk2b	3.2341	0.139014	6.1486	0.0182479
Mboat2	6.27934	0.104452	6.11743	0.00121249
Ikzf4	3.49243	0.881528	6.01902	0.0439362
F2rl2	2.90397	0.999997	5.8691	0.0351212
Cd59b	1.44653	0.999997	5.76239	0.0463372
Rgcc	5.06433	0.310299	5.59971	0.00241181
Myh10	1.98859	0.173484	5.43686	0.000451035
Ttyh2	-1.42181	0.999997	5.12535	0.0375738
Cish	8.05422	0.216365	5.03363	0.00172829
Espn	1.41078	0.999997	4.98431	0.0080528
Met	2.44401	0.999997	4.93821	0.00809098
Myo10	4.73024	0.553503	4.93175	0.00136458
Emilin2	1.99834	0.173484	4.83754	0.000127728
4930557K07Rik	3.28852	0.999997	4.81295	0.00691236
Rab44	1.37063	0.999997	4.73897	0.00618238
Gchfr	2.56561	0.165766	4.66326	0.00336827
Adamts17	1.65248	0.999997	4.65396	0.000400134
Arhgef40	2.06686	0.999997	4.62872	0.00490997
Slc22a23	1.30506	0.999997	4.58323	0.0476351
Prickle1	2.66741	0.197755	4.55421	0.000305263
Pim2	1.80423	0.999997	4.5519	0.00122571
Camk2b	1.46659	0.999997	4.5269	0.0246376
Fut8	2.75892	0.999997	4.49865	0.00456042
AV165647	3.87244	0.204678	4.47876	0.00500502
Calml4	-1.94055	0.999997	4.37896	0.0281461
Ncam2	1.22209	0.999997	4.36895	0.0102273
Itgb5	2.36434	0.999997	4.33036	0.0018835
Clnk	2.43972	0.607767	4.29091	0.00804487
Mpo	1.12222	0.999997	4.27108	0.0025377
A630076J17Rik	2.5022	0.8675	4.27102	0.0103495
Timp3	3.24226	0.086985	4.17427	0.000342525
Clec2g	1.00115	0.999997	4.16528	0.00307648
Serpina3f	2.15986	0.0575674	4.15817	0.00193516
Ccdc64	3.74691	0.0172345	4.06027	0.000174751
F2r	2.18077	0.296645	4.05963	0.000127728
Socs3	-1.59527	0.999997	3.99971	0.0444348
Fndc3b	1.3807	0.999997	3.95749	0.00350113
Muc13	-1.27294	0.999997	3.93059	0.00183038
Lta	2.18594	0.580486	3.8361	0.0283775
Nrg1	-1.01483	0.999997	3.82666	0.00252595
Plxdc2	1.88327	0.135668	3.81326	0.000451035
Gda	-1.0576	0.999997	3.8054	0.000342525
Cox4i2	1.63957	0.772107	3.80152	0.00293403
Dcpp2	1.49407	0.999997	3.7644	0.0297049
Fut8	2.23737	0.382779	3.74606	0.000212362
Aqp11	2.42798	0.999997	3.71106	0.0173815
Mcm3ap	3.6955	0.538827	3.62867	0.0192573
Enah	2.97323	0.155099	3.59486	0.00511744
Prmt10	-1.51901	0.999997	3.55691	0.0328996
Slc39a4	2.21962	0.999997	3.53708	0.00474206
Nacc2	1.56762	0.999997	3.51875	0.0013255
Islr	1.7792	0.999997	3.50551	0.0407446
9230105E05Rik	-1.1278	0.999997	3.48634	0.00498875
Ifitm1	1.75175	0.348404	3.46931	0.000127728
Cyp2u1	1.60976	0.999997	3.435	0.0120062
Tcp11l1	1.78701	0.999997	3.4342	0.0351752
Pde4a	1.29047	0.999997	3.42369	0.00304772
Elovl7	1.70627	0.999997	3.37232	0.00291219
Rassf4	1.07628	0.999997	3.35038	0.00256467
Lrp12	2.59264	0.359292	3.28946	0.00117241
Asb14	-1.01321	0.999997	3.2817	0.0362869
Igfbp7	1.27453	0.999997	3.27644	0.043753
Clec2i	-1.11008	0.999997	3.26746	0.00337063
Cdkn1a	2.51912	0.104388	3.26521	0.0021004
Ecm1	1.20452	0.999997	3.25893	0.0228612
Runx1	1.04659	0.999997	3.22838	0.00344895
Osbpl5	1.61749	0.999997	3.22578	0.000256924
Tgm1	1.4193	0.999997	3.20861	0.00265059
Thy1	1.67215	0.999997	3.19613	0.00905773
AI661453	1.67732	0.728366	3.19214	0.00149883
Trpv4	1.03129	0.999997	3.1893	0.0284136
Serpina3g	1.69876	0.800766	3.16806	0.00290468
Reps1	1.4984	0.999997	3.14155	0.00183038
Pvt1	1.83612	0.999997	3.11798	0.0292352
Timp3	1.64	0.999997	3.10623	0.00556868
Hspb3	1.87672	0.999997	3.07081	0.0468387
Il4	1.91081	0.563207	3.0676	0.0114074
Fam84b	2.13504	0.193257	3.0476	0.0297496
2310075C17Rik	1.1929	0.999997	3.03273	0.0294391
Akr1c12	1.98665	0.999997	3.01791	0.0489638
Nrg1	1.41712	0.999997	3.01204	0.00500502
Soat1	1.823	0.999997	2.99905	0.00293733
Prkd2	-1.12706	0.999997	-2.99613	0.00172829
Nxpe5	-1.74958	0.999997	-3.02611	0.0167661
AK054031	-2.87075	0.999997	-3.04172	0.0240964
Nsg2	-1.24279	0.999997	-3.05405	0.0227129
Ccl4	-1.5417	0.999997	-3.10018	0.0240964
Camkk1	-1.5281	0.999997	-3.12456	0.0462538
Epb4.1l3	-1.27307	0.999997	-3.15475	0.00241181
Spred2	-1.03689	0.999997	-3.16225	0.000336214
Rbm47	-2.21097	0.078916	-3.17592	0.000127728
Spry1	-1.21767	0.999997	-3.19002	0.00358055
Tlr7	-13.2912	0.155099	-3.19017	0.0342571
Ttc5	1.22788	0.999997	-3.19195	0.0258415
4933402N22Rik	-12.1264	0.446785	-3.19874	0.00927927
Wfdc17	-3.08113	0.114888	-3.20017	0.0274221
Dmwd	-1.05462	0.999997	-3.22578	0.00423055
Gsn	-1.43386	0.999997	-3.25837	0.0128941
Tmem243	-2.17067	0.999997	-3.28573	0.029189
Osgin1	-1.30918	0.999997	-3.29314	0.00576379
Arl5c	-1.33475	0.999997	-3.31114	0.000531029
Btla	-1.21238	0.999997	-3.32537	0.0414784
6030498E09Rik	-1.39938	0.999997	-3.39991	0.0188848
Pdgfd	-1.2722	0.999997	-3.4226	0.00525483
Ppp1r16b	-1.56276	0.999997	-3.43753	0.0245456
Bcl6	-1.55451	0.999997	-3.47984	0.00090481
Mpped2	1.65647	0.999997	-3.53763	0.0311936
Ccl4	-1.66874	0.999997	-3.56702	0.0219422
Fam198b	-1.11884	0.999997	-3.57507	0.0182479
Sstr2	-3.7092	0.0535682	-3.61104	0.00485005
Zfp503	-1.48801	0.999997	-3.64683	0.0261279
Tmem121	-2.06603	0.999997	-3.65157	0.0154301
Ublcp1	1.11241	0.999997	-3.69188	0.0156884
Epha7	-1.57859	0.999997	-3.70054	0.00804487
Fam169b	-1.12501	0.999997	-3.73167	0.013057
Zfp618	-1.26868	0.999997	-3.75298	0.00117241
Ankrd6	-1.94167	0.999997	-3.75336	0.0204981
Mn1	-1.32064	0.999997	-3.75646	0.00122571
Prkg1	-1.44515	0.999997	-3.75943	0.0342571
Gfra2	-3.72777	0.310299	-3.76655	0.004265
Wfdc18	-2.111	0.310299	-3.78526	0.00142889
Pcp4l1	-5.4997	0.999997	-3.80062	0.0195179
5930403L14Rik	-1.067	0.999997	-3.90215	0.0130328
Ctf1	-1.50167	0.999997	-3.90885	0.00804487
Il7r	-3.60798	0.0535682	-4.05024	0.00211075
Bfsp2	-2.3822	0.999997	-4.11362	0.00207556
Peak1	-1.38334	0.999997	-4.16683	0.0300035
Thbd	-2.59755	0.999997	-4.16825	0.0288914
Ctnnd2	-2.4333	0.533107	-4.19486	0.00673942
Pdgfa	-2.97044	0.703635	-4.24914	0.00193516
Sytl4	-1.74496	0.999997	-4.27588	0.00156622
Emp1	-2.05318	0.310299	-4.28049	0.00117241
Gria2	1.08073	0.999997	-4.29365	0.0123256
Btg2	-4.61605	0.999997	-4.34836	0.036057
Fam101b	-3.30451	0.815094	-4.55014	0.0423276
P2ry13	-3.68319	0.293514	-4.67577	0.010986
Ndn	-1.03155	0.999997	-4.71963	0.00241181
Rag2	-11.5887	0.220323	-4.87034	0.00116008
Ddx4	-1.09539	0.999997	-4.95565	0.0013255
Ebf1	-1.69364	0.999997	-5.23324	0.0398943
Spry2	-3.70345	0.430681	-5.33767	0.00307648
Pou6f1	-1.54228	0.999997	-5.37487	0.0176534
Satb1	-2.25048	0.999997	-5.46563	0.0220702
Tek	-2.36816	0.999997	-5.67665	0.0297049
Pvrl2	1.31449	0.999997	-5.89544	0.00555051
Chil5	-1.90083	0.850693	-6.07099	0.00172829
Dmwd	-1.05357	0.999997	-6.33563	0.0205051
Ankrd6	-2.04673	0.976863	-6.38594	0.000134229
Egr1	1.04862	0.999997	-7.21258	0.0143914
Itga9	-2.0509	0.830371	-7.32859	0.00484208
Atp1b1	-3.93646	0.617261	-7.8059	0.00288081
Itga9	-2.0433	0.999997	-8.3736	0.00336827
Tnk2	-1.54363	0.999997	-8.42191	0.0407636
Etv5	1.00615	0.999997	-8.83038	0.000127728
P2rx7	-2.32442	0.413665	-9.01225	0.0113004
Nsg2	-2.6214	0.999997	-9.85967	0.0079168
Lpar1	-9.60516	0.502659	-10.8011	0.0346564
Bank1	-2.33497	0.505523	-11.4755	0.00163146
Sdc4	-3.40295	0.362918	-11.5964	0.000174751
P2rx7	-2.20184	0.377201	-11.7578	0.000577281
Msrb3	-1.99551	0.416087	-13.9986	0.00142889
Oraov1	-2.57412	0.140035	-16.8051	0.000127728
Hmox1	-2.32032	0.999997	-17.2009	0.00445911
St8sia1	-9.30878	0.00607636	-18.5004	0.00335253
Ccr9	-12.3325	0.00455169	-18.6485	0.0358319
Ccnd1	-2.34252	0.152435	-18.8175	0.000127728
Gem	-1.65535	0.999997	-19.7254	0.000262266
Postn	-5.48297	0.382779	-22.6529	0.00172829
Dusp6	-1.51206	0.999997	-23.293	0.000127728
Postn	-1.92704	0.873927	-26.2182	0.00193516
Rgs1	-2.99272	0.999997	-29.2169	0.00117241
Cd33	-8.25202	0.599363	-29.6937	0.00293403
